# Supplementary material
Source: publisher figshare collection journal article supplement (https://acs.figshare.com/ndownloader/files/5132149)
Supplement: Supplementary file 1 [file 5132149]

data_global

_publ_contact_author        'Manfred Bochmann'

_publ_contact_author_email     'm.bochmann@uea.ac.uk'

_publ_section_title
;
 The Reactivity of Silyl-Substituted Allyl Ligands with
 Group 4, 5, 9 and 10 Metals :
 Routes to \h^3^-Allyls, Alkylidenes and sec-Alkyl Carbocations
;

_publ_author_name
;
 Mark Schormann, Shaun Garratt and Manfred Bochmann
;
_publ_author_address
;
 Wolfson Materials and Catalysis Centre, School of Chemical Sciences,
 University of East Anglia, Norwich NR4 7TJ, UK
;

_journal_name_full         'Organometallics'


data_sg1

_audit_creation_method            SHELXL
_chemical_name_systematic         ?


_chemical_name_common             1
_chemical_formula_moiety          ?
_chemical_formula_structural      ?
_chemical_formula_analytical      ?
_chemical_formula_sum             'C18 H42 Co Si4'
_chemical_formula_weight          429.81
_chemical_melting_point           ?
_chemical_compound_source         ?

loop_
 _atom_type_symbol
 _atom_type_description
 _atom_type_scat_dispersion_real
 _atom_type_scat_dispersion_imag
 _atom_type_scat_source
 'C'  'C'   0.0033   0.0016
 'International Tables Vol C Tables 4.2.6.8 and 6.1.1.4'
 'H'  'H'   0.0000   0.0000
 'International Tables Vol C Tables 4.2.6.8 and 6.1.1.4'
 'Si'  'Si'   0.0817   0.0704
 'International Tables Vol C Tables 4.2.6.8 and 6.1.1.4'
 'Co'  'Co'   0.3494   0.9721
 'International Tables Vol C Tables 4.2.6.8 and 6.1.1.4'

_symmetry_cell_setting            'monoclinic'
_symmetry_space_group_name_H-M    'P21/c'

loop_
 _symmetry_equiv_pos_as_xyz
 'x, y, z'
 '-x, y+1/2, -z+1/2'
 '-x, -y, -z'
 'x, -y-1/2, z-1/2'

_cell_length_a                    12.323(3)
_cell_length_b                    10.322(2)
_cell_length_c                    21.059(4)
_cell_angle_alpha                 90.00
_cell_angle_beta                  99.59(3)
_cell_angle_gamma                 90.00
_cell_volume                      2641.2(9)
_cell_formula_units_Z             4
_cell_measurement_temperature     140(1)
_cell_measurement_reflns_used     ?
_cell_measurement_theta_min       ?
_cell_measurement_theta_max       ?

_exptl_crystal_description        'block'
_exptl_crystal_colour             'orange'
_exptl_crystal_size_max           0.4
_exptl_crystal_size_mid           0.3
_exptl_crystal_size_min           0.3
_exptl_crystal_density_meas       ?
_exptl_crystal_density_diffrn     1.081
_exptl_crystal_density_method     ?
_exptl_crystal_F_000              932
_exptl_absorpt_coefficient_mu     0.830
_exptl_absorpt_correction_type    'none'
_exptl_absorpt_correction_T_min   ?
_exptl_absorpt_correction_T_max   ?

_exptl_special_details            ?

_diffrn_ambient_temperature       140(1)
_diffrn_radiation_wavelength      0.71073
_diffrn_radiation_type            MoK\a
_diffrn_radiation_source          'rotating anode'
_diffrn_radiation_monochromator   graphite
_diffrn_measurement_device        'Rigaku R-Axis-IIc'
_diffrn_measurement_method        'image-plate oscillation photos'
_diffrn_standards_number          ?
_diffrn_standards_interval_count  ?
_diffrn_standards_interval_time   ?
_diffrn_standards_decay_%         0
_diffrn_reflns_number             9027
_diffrn_reflns_av_R_equivalents   0.0231
_diffrn_reflns_av_sigmaI/netI     0.0402
_diffrn_reflns_limit_h_min        -14
_diffrn_reflns_limit_h_max        14
_diffrn_reflns_limit_k_min        -12
_diffrn_reflns_limit_k_max        12
_diffrn_reflns_limit_l_min        -25
_diffrn_reflns_limit_l_max        25
_diffrn_reflns_theta_min          1.96
_diffrn_reflns_theta_max          25.40
_reflns_number_total              4832
_reflns_number_observed           4071
_reflns_observed_criterion        >2sigma(I)

_computing_data_collection        'MSC R-Axis-II control software'
_computing_cell_refinement        'DENZO (Otwinowski and Minor, 1985)'
_computing_data_reduction
;
 DENZO, Scalepack (Otwinowski and Minor, 1985)
;
_computing_structure_solution     'XS (SHELXTL, v.5, 1994)'
_computing_structure_refinement   'XL (SHELXTL, v.5, 1994)'
_computing_molecular_graphics     'XP (SHELXTL, v.5, 1994)'
_computing_publication_material   'XL (SHELXTL, v.5, 1994)'

_refine_special_details
;
 Refinement of F^2^ against ALL reflections.  The weighted R-factor wR and
 goodness of fit S are based on F^2^, conventional R-factors R are based
 on F, with F set to zero for negative F^2^. The threshold expression of
 F^2^ > 2sigma(F^2^) is used only for calculating R-factors(gt) etc. and is
 not relevant to the choice of reflections for refinement.  R-factors based
 on F^2^ are statistically about twice as large as those based on F, and R-
 factors based on ALL data will be even larger.
;

_refine_ls_structure_factor_coef  Fsqd
_refine_ls_matrix_type            full
_refine_ls_weighting_scheme
 'calc w=1/[\s^2^(Fo^2^)+(0.0609P)^2^+0.0000P] where P=(Fo^2^+2Fc^2^)/3'
_atom_sites_solution_primary      direct
_atom_sites_solution_secondary    difmap
_atom_sites_solution_hydrogens    geom
_refine_ls_hydrogen_treatment     'mixed'
_refine_ls_extinction_method      none
_refine_ls_extinction_coef        ?
_refine_ls_number_reflns          4832
_refine_ls_number_parameters      232
_refine_ls_number_restraints      0
_refine_ls_R_factor_all           0.0399
_refine_ls_R_factor_obs           0.0332
_refine_ls_wR_factor_all          0.0961
_refine_ls_wR_factor_obs          0.0930
_refine_ls_goodness_of_fit_all    1.059
_refine_ls_goodness_of_fit_obs    1.122
_refine_ls_restrained_S_all       1.059
_refine_ls_restrained_S_obs       1.122
_refine_ls_shift/esd_max          -0.004
_refine_ls_shift/esd_mean         0.000

loop_
 _atom_site_label
 _atom_site_type_symbol
 _atom_site_fract_x
 _atom_site_fract_y
 _atom_site_fract_z
 _atom_site_U_iso_or_equiv
 _atom_site_thermal_displace_type
 _atom_site_occupancy
 _atom_site_calc_flag
 _atom_site_refinement_flags
 _atom_site_disorder_group
Co1 Co 0.32021(2) 0.36229(2) 0.095751(11) 0.02689(10) Uani 1 d . .
C1 C 0.3240(2) 0.1787(2) 0.05922(10) 0.0314(4) Uani 1 d . .
Si1 Si 0.27736(5) 0.18814(6) -0.02994(3) 0.03521(15) Uani 1 d . .
C11 C 0.2186(2) 0.3493(2) -0.05875(11) 0.0517(6) Uani 1 d . .
H11A H 0.2727(2) 0.4157(2) -0.04673(11) 0.078 Uiso 1 calc R .
H11B H 0.1548(2) 0.3672(2) -0.03949(11) 0.078 Uiso 1 calc R .
H11C H 0.1980(2) 0.3477(2) -0.10476(11) 0.078 Uiso 1 calc R .
C12 C 0.1697(2) 0.0625(3) -0.05422(12) 0.0666(8) Uani 1 d . .
H12A H 0.1073(2) 0.0798(3) -0.03365(12) 0.100 Uiso 1 calc R .
H12B H 0.1991(2) -0.0215(3) -0.04139(12) 0.100 Uiso 1 calc R .
H12C H 0.1474(2) 0.0644(3) -0.10011(12) 0.100 Uiso 1 calc R .
C13 C 0.3999(2) 0.1563(3) -0.06951(12) 0.0593(7) Uani 1 d . .
H13A H 0.4547(2) 0.2214(3) -0.05664(12) 0.089 Uiso 1 calc R .
H13B H 0.3781(2) 0.1585(3) -0.11544(12) 0.089 Uiso 1 calc R .
H13C H 0.4297(2) 0.0725(3) -0.05675(12) 0.089 Uiso 1 calc R .
C2 C 0.2575(2) 0.1866(2) 0.10786(10) 0.0305(4) Uani 1 d . .
C3 C 0.1703(2) 0.2757(2) 0.10673(9) 0.0302(4) Uani 1 d . .
Si3 Si 0.09097(4) 0.28092(5) 0.17480(3) 0.03247(14) Uani 1 d . .
C31 C 0.0439(2) 0.1116(2) 0.18799(12) 0.0543(6) Uani 1 d . .
H31A H 0.0027(2) 0.1111(2) 0.22287(12) 0.081 Uiso 1 calc R .
H31B H 0.1068(2) 0.0559(2) 0.19833(12) 0.081 Uiso 1 calc R .
H31C H -0.0019(2) 0.0810(2) 0.14951(12) 0.081 Uiso 1 calc R .
C32 C 0.1793(2) 0.3367(2) 0.25096(10) 0.0446(5) Uani 1 d . .
H32A H 0.1364(2) 0.3385(2) 0.28508(10) 0.067 Uiso 1 calc R .
H32B H 0.2066(2) 0.4221(2) 0.24478(10) 0.067 Uiso 1 calc R .
H32C H 0.2400(2) 0.2782(2) 0.26207(10) 0.067 Uiso 1 calc R .
C33 C -0.0325(2) 0.3870(2) 0.15381(11) 0.0485(6) Uani 1 d . .
H33A H -0.0726(2) 0.3889(2) 0.18917(11) 0.073 Uiso 1 calc R .
H33B H -0.0789(2) 0.3534(2) 0.11627(11) 0.073 Uiso 1 calc R .
H33C H -0.0095(2) 0.4731(2) 0.14519(11) 0.073 Uiso 1 calc R .
C4 C 0.47369(15) 0.4278(2) 0.08531(10) 0.0349(4) Uani 1 d . .
Si4 Si 0.56947(5) 0.36476(5) 0.15683(3) 0.0395(2) Uani 1 d . .
C41 C 0.6610(2) 0.2477(3) 0.1222(2) 0.0801(10) Uani 1 d . .
H41A H 0.6962(2) 0.2913(3) 0.0909(2) 0.120 Uiso 1 calc R .
H41B H 0.6176(2) 0.1772(3) 0.1020(2) 0.120 Uiso 1 calc R .
H41C H 0.7159(2) 0.2148(3) 0.1561(2) 0.120 Uiso 1 calc R .
C42 C 0.6527(2) 0.4986(2) 0.19997(11) 0.0497(6) Uani 1 d . .
H42A H 0.6890(2) 0.5455(2) 0.17016(11) 0.075 Uiso 1 calc R .
H42B H 0.7067(2) 0.4630(2) 0.23355(11) 0.075 Uiso 1 calc R .
H42C H 0.6053(2) 0.5562(2) 0.21841(11) 0.075 Uiso 1 calc R .
C43 C 0.5019(2) 0.2790(3) 0.21746(15) 0.0851(11) Uani 1 d . .
H43A H 0.4581(2) 0.2090(3) 0.19704(15) 0.128 Uiso 1 calc R .
H43B H 0.4556(2) 0.3385(3) 0.23567(15) 0.128 Uiso 1 calc R .
H43C H 0.5571(2) 0.2453(3) 0.25097(15) 0.128 Uiso 1 calc R .
C5 C 0.39552(15) 0.5296(2) 0.08158(10) 0.0318(4) Uani 1 d . .
C6 C 0.3282(2) 0.5542(2) 0.12900(9) 0.0309(4) Uani 1 d . .
Si6 Si 0.22096(5) 0.68297(5) 0.11450(3) 0.03404(15) Uani 1 d . .
C61 C 0.1523(2) 0.7032(2) 0.18631(12) 0.0534(6) Uani 1 d . .
H61A H 0.0975(2) 0.7698(2) 0.17799(12) 0.080 Uiso 1 calc R .
H61B H 0.2061(2) 0.7271(2) 0.22284(12) 0.080 Uiso 1 calc R .
H61C H 0.1181(2) 0.6231(2) 0.19509(12) 0.080 Uiso 1 calc R .
C62 C 0.1178(2) 0.6450(2) 0.04147(11) 0.0507(6) Uani 1 d . .
H62A H 0.1546(2) 0.6349(2) 0.00504(11) 0.076 Uiso 1 calc R .
H62B H 0.0655(2) 0.7145(2) 0.03345(11) 0.076 Uiso 1 calc R .
H62C H 0.0801(2) 0.5662(2) 0.04837(11) 0.076 Uiso 1 calc R .
C63 C 0.2877(2) 0.8403(2) 0.09997(13) 0.0518(6) Uani 1 d . .
H63A H 0.3238(2) 0.8323(2) 0.06313(13) 0.078 Uiso 1 calc R .
H63B H 0.3409(2) 0.8625(2) 0.13708(13) 0.078 Uiso 1 calc R .
H63C H 0.2328(2) 0.9070(2) 0.09225(13) 0.078 Uiso 1 calc R .
H1* H 0.3876(18) 0.1323(19) 0.0698(10) 0.034(6) Uiso 1 d . .
H2* H 0.2833(17) 0.1452(19) 0.1488(10) 0.037(6) Uiso 1 d . .
H3* H 0.1323(16) 0.3013(19) 0.0632(10) 0.031(5) Uiso 1 d . .
H4* H 0.5037(19) 0.4068(24) 0.0461(11) 0.054(7) Uiso 1 d . .
H5* H 0.3737(15) 0.5689(19) 0.0398(10) 0.032(5) Uiso 1 d . .
H6* H 0.3605(16) 0.5315(19) 0.1733(10) 0.039(6) Uiso 1 d . .

loop_
 _atom_site_aniso_label
 _atom_site_aniso_U_11
 _atom_site_aniso_U_22
 _atom_site_aniso_U_33
 _atom_site_aniso_U_23
 _atom_site_aniso_U_13
 _atom_site_aniso_U_12
Co1 0.0285(2) 0.0228(2) 0.0300(2) 0.00073(10) 0.00685(11) -0.00156(9)
C1 0.0322(10) 0.0240(9) 0.0383(11) -0.0015(8) 0.0064(8) -0.0006(8)
Si1 0.0396(3) 0.0340(3) 0.0333(3) -0.0031(2) 0.0095(2) -0.0019(2)
C11 0.069(2) 0.0525(15) 0.0345(12) 0.0058(10) 0.0113(11) 0.0126(12)
C12 0.080(2) 0.070(2) 0.0442(14) 0.0014(13) -0.0072(13) -0.031(2)
C13 0.061(2) 0.071(2) 0.0510(14) -0.0085(13) 0.0238(12) 0.0098(13)
C2 0.0358(10) 0.0231(10) 0.0323(10) 0.0019(8) 0.0045(8) -0.0060(8)
C3 0.0322(9) 0.0297(10) 0.0292(10) 0.0015(8) 0.0064(8) -0.0045(8)
Si3 0.0332(3) 0.0360(3) 0.0295(3) 0.0008(2) 0.0089(2) -0.0032(2)
C31 0.0618(15) 0.0515(15) 0.0554(14) 0.0011(12) 0.0263(12) -0.0188(12)
C32 0.0502(13) 0.0487(13) 0.0348(11) -0.0017(10) 0.0069(10) 0.0017(10)
C33 0.0385(11) 0.066(2) 0.0422(12) 0.0023(11) 0.0111(10) 0.0066(11)
C4 0.0315(10) 0.0304(11) 0.0444(12) 0.0032(9) 0.0115(9) -0.0021(8)
Si4 0.0301(3) 0.0317(3) 0.0549(4) 0.0024(3) 0.0019(3) -0.0018(2)
C41 0.060(2) 0.066(2) 0.102(2) -0.034(2) -0.020(2) 0.0261(15)
C42 0.0554(13) 0.0469(13) 0.0470(13) -0.0076(10) 0.0095(11) -0.0112(11)
C43 0.054(2) 0.110(3) 0.081(2) 0.059(2) -0.0176(15) -0.030(2)
C5 0.0333(10) 0.0260(10) 0.0366(10) 0.0035(8) 0.0073(8) -0.0052(8)
C6 0.0370(10) 0.0235(10) 0.0319(10) -0.0001(8) 0.0052(8) -0.0053(8)
Si6 0.0397(3) 0.0252(3) 0.0384(3) -0.0004(2) 0.0099(2) 0.0017(2)
C61 0.0625(15) 0.0435(14) 0.0595(15) -0.0034(11) 0.0256(12) 0.0081(11)
C62 0.0502(14) 0.0487(14) 0.0507(14) -0.0006(11) 0.0010(11) 0.0115(11)
C63 0.0583(14) 0.0306(12) 0.068(2) 0.0066(11) 0.0151(12) 0.0026(10)

_geom_special_details
;
 All esds (except the esd in the dihedral angle between two l.s. planes)
 are estimated using the full covariance matrix.  The cell esds are taken
 into account individually in the estimation of esds in distances, angles
 and torsion angles; correlations between esds in cell parameters are only
 used when they are defined by crystal symmetry.  An approximate (isotropic)
 treatment of cell esds is used for estimating esds involving l.s. planes.
;

loop_
 _geom_bond_atom_site_label_1
 _geom_bond_atom_site_label_2
 _geom_bond_distance
 _geom_bond_site_symmetry_2
 _geom_bond_publ_flag
Co1 C2 2.004(2) . ?
Co1 C5 2.007(2) . ?
Co1 C1 2.049(2) . ?
Co1 C4 2.055(2) . ?
Co1 C6 2.098(2) . ?
Co1 C3 2.099(2) . ?
C1 C2 1.417(3) . ?
C1 Si1 1.872(2) . ?
C1 H1* 0.91(2) . ?
Si1 C12 1.865(2) . ?
Si1 C13 1.871(3) . ?
Si1 C11 1.875(2) . ?
C11 H11A 0.96 . ?
C11 H11B 0.96 . ?
C11 H11C 0.96 . ?
C12 H12A 0.96 . ?
C12 H12B 0.96 . ?
C12 H12C 0.96 . ?
C13 H13A 0.96 . ?
C13 H13B 0.96 . ?
C13 H13C 0.96 . ?
C2 C3 1.412(3) . ?
C2 H2* 0.97(2) . ?
C3 Si3 1.866(2) . ?
C3 H3* 0.99(2) . ?
Si3 C33 1.867(2) . ?
Si3 C32 1.873(2) . ?
Si3 C31 1.877(2) . ?
C31 H31A 0.96 . ?
C31 H31B 0.96 . ?
C31 H31C 0.96 . ?
C32 H32A 0.96 . ?
C32 H32B 0.96 . ?
C32 H32C 0.96 . ?
C33 H33A 0.96 . ?
C33 H33B 0.96 . ?
C33 H33C 0.96 . ?
C4 C5 1.419(3) . ?
C4 Si4 1.869(2) . ?
C4 H4* 0.98(2) . ?
Si4 C43 1.860(3) . ?
Si4 C42 1.864(2) . ?
Si4 C41 1.881(3) . ?
C41 H41A 0.96 . ?
C41 H41B 0.96 . ?
C41 H41C 0.96 . ?
C42 H42A 0.96 . ?
C42 H42B 0.96 . ?
C42 H42C 0.96 . ?
C43 H43A 0.96 . ?
C43 H43B 0.96 . ?
C43 H43C 0.96 . ?
C5 C6 1.423(3) . ?
C5 H5* 0.97(2) . ?
C6 Si6 1.863(2) . ?
C6 H6* 0.98(2) . ?
Si6 C61 1.863(2) . ?
Si6 C62 1.867(2) . ?
Si6 C63 1.869(2) . ?
C61 H61A 0.96 . ?
C61 H61B 0.96 . ?
C61 H61C 0.96 . ?
C62 H62A 0.96 . ?
C62 H62B 0.96 . ?
C62 H62C 0.96 . ?
C63 H63A 0.96 . ?
C63 H63B 0.96 . ?
C63 H63C 0.96 . ?

loop_
 _geom_angle_atom_site_label_1
 _geom_angle_atom_site_label_2
 _geom_angle_atom_site_label_3
 _geom_angle
 _geom_angle_site_symmetry_1
 _geom_angle_site_symmetry_3
 _geom_angle_publ_flag
C2 Co1 C5 174.59(8) . . ?
C2 Co1 C1 40.91(8) . . ?
C5 Co1 C1 134.44(8) . . ?
C2 Co1 C4 133.84(8) . . ?
C5 Co1 C4 40.88(8) . . ?
C1 Co1 C4 100.66(8) . . ?
C2 Co1 C6 144.07(8) . . ?
C5 Co1 C6 40.49(8) . . ?
C1 Co1 C6 174.86(8) . . ?
C4 Co1 C6 74.45(8) . . ?
C2 Co1 C3 40.17(8) . . ?
C5 Co1 C3 145.10(8) . . ?
C1 Co1 C3 73.94(8) . . ?
C4 Co1 C3 174.00(8) . . ?
C6 Co1 C3 111.02(8) . . ?
C2 C1 Si1 127.14(15) . . ?
C2 C1 Co1 67.85(11) . . ?
Si1 C1 Co1 107.81(10) . . ?
C2 C1 H1* 115.4(13) . . ?
Si1 C1 H1* 112.3(13) . . ?
Co1 C1 H1* 117.8(12) . . ?
C12 Si1 C13 110.21(13) . . ?
C12 Si1 C1 108.93(10) . . ?
C13 Si1 C1 107.54(11) . . ?
C12 Si1 C11 108.05(13) . . ?
C13 Si1 C11 108.00(12) . . ?
C1 Si1 C11 114.10(10) . . ?
Si1 C11 H11A 109.47(9) . . ?
Si1 C11 H11B 109.47(8) . . ?
H11A C11 H11B 109.5 . . ?
Si1 C11 H11C 109.47(8) . . ?
H11A C11 H11C 109.5 . . ?
H11B C11 H11C 109.5 . . ?
Si1 C12 H12A 109.47(10) . . ?
Si1 C12 H12B 109.47(10) . . ?
H12A C12 H12B 109.5 . . ?
Si1 C12 H12C 109.47(8) . . ?
H12A C12 H12C 109.5 . . ?
H12B C12 H12C 109.5 . . ?
Si1 C13 H13A 109.47(9) . . ?
Si1 C13 H13B 109.47(9) . . ?
H13A C13 H13B 109.5 . . ?
Si1 C13 H13C 109.47(9) . . ?
H13A C13 H13C 109.5 . . ?
H13B C13 H13C 109.5 . . ?
C3 C2 C1 123.8(2) . . ?
C3 C2 Co1 73.53(11) . . ?
C1 C2 Co1 71.24(11) . . ?
C3 C2 H2* 116.1(13) . . ?
C1 C2 H2* 118.3(13) . . ?
Co1 C2 H2* 115.9(12) . . ?
C2 C3 Si3 120.03(14) . . ?
C2 C3 Co1 66.30(10) . . ?
Si3 C3 Co1 130.98(10) . . ?
C2 C3 H3* 115.4(11) . . ?
Si3 C3 H3* 118.4(11) . . ?
Co1 C3 H3* 94.2(11) . . ?
C3 Si3 C33 110.23(10) . . ?
C3 Si3 C32 111.27(9) . . ?
C33 Si3 C32 110.90(11) . . ?
C3 Si3 C31 107.54(10) . . ?
C33 Si3 C31 108.73(12) . . ?
C32 Si3 C31 108.04(11) . . ?
Si3 C31 H31A 109.47(8) . . ?
Si3 C31 H31B 109.47(8) . . ?
H31A C31 H31B 109.5 . . ?
Si3 C31 H31C 109.47(8) . . ?
H31A C31 H31C 109.5 . . ?
H31B C31 H31C 109.5 . . ?
Si3 C32 H32A 109.47(7) . . ?
Si3 C32 H32B 109.47(8) . . ?
H32A C32 H32B 109.5 . . ?
Si3 C32 H32C 109.47(8) . . ?
H32A C32 H32C 109.5 . . ?
H32B C32 H32C 109.5 . . ?
Si3 C33 H33A 109.47(7) . . ?
Si3 C33 H33B 109.47(8) . . ?
H33A C33 H33B 109.5 . . ?
Si3 C33 H33C 109.47(8) . . ?
H33A C33 H33C 109.5 . . ?
H33B C33 H33C 109.5 . . ?
C5 C4 Si4 129.4(2) . . ?
C5 C4 Co1 67.74(10) . . ?
Si4 C4 Co1 105.56(10) . . ?
C5 C4 H4* 117.6(14) . . ?
Si4 C4 H4* 108.9(13) . . ?
Co1 C4 H4* 119.9(13) . . ?
C43 Si4 C42 106.92(13) . . ?
C43 Si4 C4 115.08(10) . . ?
C42 Si4 C4 110.92(10) . . ?
C43 Si4 C41 109.0(2) . . ?
C42 Si4 C41 110.38(12) . . ?
C4 Si4 C41 104.50(12) . . ?
Si4 C41 H41A 109.47(12) . . ?
Si4 C41 H41B 109.47(9) . . ?
H41A C41 H41B 109.5 . . ?
Si4 C41 H41C 109.47(10) . . ?
H41A C41 H41C 109.5 . . ?
H41B C41 H41C 109.5 . . ?
Si4 C42 H42A 109.47(8) . . ?
Si4 C42 H42B 109.47(8) . . ?
H42A C42 H42B 109.5 . . ?
Si4 C42 H42C 109.47(8) . . ?
H42A C42 H42C 109.5 . . ?
H42B C42 H42C 109.5 . . ?
Si4 C43 H43A 109.47(11) . . ?
Si4 C43 H43B 109.47(12) . . ?
H43A C43 H43B 109.5 . . ?
Si4 C43 H43C 109.47(8) . . ?
H43A C43 H43C 109.5 . . ?
H43B C43 H43C 109.5 . . ?
C4 C5 C6 124.3(2) . . ?
C4 C5 Co1 71.38(11) . . ?
C6 C5 Co1 73.22(11) . . ?
C4 C5 H5* 116.4(12) . . ?
C6 C5 H5* 117.3(12) . . ?
Co1 C5 H5* 115.5(12) . . ?
C5 C6 Si6 119.52(14) . . ?
C5 C6 Co1 66.29(10) . . ?
Si6 C6 Co1 128.75(10) . . ?
C5 C6 H6* 115.8(12) . . ?
Si6 C6 H6* 119.4(12) . . ?
Co1 C6 H6* 94.6(12) . . ?
C61 Si6 C6 110.63(10) . . ?
C61 Si6 C62 110.68(12) . . ?
C6 Si6 C62 110.66(10) . . ?
C61 Si6 C63 107.89(11) . . ?
C6 Si6 C63 109.08(10) . . ?
C62 Si6 C63 107.79(11) . . ?
Si6 C61 H61A 109.47(8) . . ?
Si6 C61 H61B 109.47(8) . . ?
H61A C61 H61B 109.5 . . ?
Si6 C61 H61C 109.47(8) . . ?
H61A C61 H61C 109.5 . . ?
H61B C61 H61C 109.5 . . ?
Si6 C62 H62A 109.47(8) . . ?
Si6 C62 H62B 109.47(8) . . ?
H62A C62 H62B 109.5 . . ?
Si6 C62 H62C 109.47(8) . . ?
H62A C62 H62C 109.5 . . ?
H62B C62 H62C 109.5 . . ?
Si6 C63 H63A 109.47(8) . . ?
Si6 C63 H63B 109.47(8) . . ?
H63A C63 H63B 109.5 . . ?
Si6 C63 H63C 109.47(8) . . ?
H63A C63 H63C 109.5 . . ?
H63B C63 H63C 109.5 . . ?

_refine_diff_density_max    0.476
_refine_diff_density_min   -0.559
_refine_diff_density_rms    0.052

#===END

data_sg2

_audit_creation_method            SHELXL
_chemical_name_systematic
;
 ?
;
_chemical_name_common             2
_chemical_formula_moiety          ?
_chemical_formula_structural      ?
_chemical_formula_analytical      ?
_chemical_formula_sum             'C18 H42 Ni Si4'
_chemical_formula_weight          429.59
_chemical_melting_point           ?
_chemical_compound_source         ?

loop_
 _atom_type_symbol
 _atom_type_description
 _atom_type_scat_dispersion_real
 _atom_type_scat_dispersion_imag
 _atom_type_scat_source
 'C'  'C'   0.0033   0.0016
 'International Tables Vol C Tables 4.2.6.8 and 6.1.1.4'
 'H'  'H'   0.0000   0.0000
 'International Tables Vol C Tables 4.2.6.8 and 6.1.1.4'
 'Si'  'Si'   0.0817   0.0704
 'International Tables Vol C Tables 4.2.6.8 and 6.1.1.4'
 'Ni'  'Ni'   0.3393   1.1124
 'International Tables Vol C Tables 4.2.6.8 and 6.1.1.4'

_symmetry_cell_setting            'Monoclinic'
_symmetry_space_group_name_H-M    'C2/c'

loop_
 _symmetry_equiv_pos_as_xyz
 'x, y, z'
 '-x, y, -z+1/2'
 'x+1/2, y+1/2, z'
 '-x+1/2, y+1/2, -z+1/2'
 '-x, -y, -z'
 'x, -y, z-1/2'
 '-x+1/2, -y+1/2, -z'
 'x+1/2, -y+1/2, z-1/2'

_cell_length_a                    16.578(3)
_cell_length_b                    12.430(3)
_cell_length_c                    12.698(3)
_cell_angle_alpha                 90.00
_cell_angle_beta                  90.84(3)
_cell_angle_gamma                 90.00
_cell_volume                      2616.3(9)
_cell_formula_units_Z             4
_cell_measurement_temperature     140(1)
_cell_measurement_reflns_used     ?
_cell_measurement_theta_min       ?
_cell_measurement_theta_max       ?

_exptl_crystal_description        'block'
_exptl_crystal_colour             'orange'
_exptl_crystal_size_max           0.3
_exptl_crystal_size_mid           0.2
_exptl_crystal_size_min           0.2
_exptl_crystal_density_meas       ?
_exptl_crystal_density_diffrn     1.091
_exptl_crystal_density_method     ?
_exptl_crystal_F_000              936
_exptl_absorpt_coefficient_mu     0.924
_exptl_absorpt_correction_type    'none'
_exptl_absorpt_correction_T_min   ?
_exptl_absorpt_correction_T_max   ?

_exptl_special_details
;
 ?
;

_diffrn_ambient_temperature       140(1)
_diffrn_radiation_wavelength      0.71073
_diffrn_radiation_type            MoK\a
_diffrn_radiation_source          'rotating anode'
_diffrn_radiation_monochromator   graphite
_diffrn_measurement_device        'Rigaku R-Axis-IIc'
_diffrn_measurement_method        'image-plate oscillation photos'
_diffrn_standards_number          ?
_diffrn_standards_interval_count  ?
_diffrn_standards_interval_time   ?
_diffrn_standards_decay_%         0
_diffrn_reflns_number             4121
_diffrn_reflns_av_R_equivalents   0.0558
_diffrn_reflns_av_sigmaI/netI     0.0593
_diffrn_reflns_limit_h_min        -19
_diffrn_reflns_limit_h_max        20
_diffrn_reflns_limit_k_min        -14
_diffrn_reflns_limit_k_max        14
_diffrn_reflns_limit_l_min        -15
_diffrn_reflns_limit_l_max        15
_diffrn_reflns_theta_min          3.28
_diffrn_reflns_theta_max          25.45
_reflns_number_total              2365
_reflns_number_observed           2125
_reflns_observed_criterion        >2sigma(I)

_computing_data_collection        'MSC R-Axis-II control software'
_computing_cell_refinement        'DENZO (Otwinowski and Minor, 1985)'
_computing_data_reduction
;
 DENZO, Scalepack (Otwinowski and Minor, 1985)
;
_computing_structure_solution     'XS (SHELXTL, v.5, 1994)'
_computing_structure_refinement   'XL (SHELXTL, v.5, 1994)'
_computing_molecular_graphics     'XP (SHELXTL, v.5, 1994)'
_computing_publication_material   'XL (SHELXTL, v.5, 1994)'

_refine_special_details
;
 Refinement on F^2^ for ALL reflections except for 0 with very negative F^2^
 or flagged by the user for potential systematic errors.  Weighted R-factors
 wR and all goodnesses of fit S are based on F^2^, conventional R-factors R
 are based on F, with F set to zero for negative F^2^. The observed criterion
 of F^2^ > 2sigma(F^2^) is used only for calculating _R_factor_obs etc. and is
 not relevant to the choice of reflections for refinement.  R-factors based
 on F^2^ are statistically about twice as large as those based on F, and R-
 factors based on ALL data will be even larger.
;

_refine_ls_structure_factor_coef  Fsqd
_refine_ls_matrix_type            full
_refine_ls_weighting_scheme
 'calc w=1/[\s^2^(Fo^2^)+(0.0501P)^2^+3.7741P] where P=(Fo^2^+2Fc^2^)/3'
_atom_sites_solution_primary      direct
_atom_sites_solution_secondary    difmap
_atom_sites_solution_hydrogens    geom
_refine_ls_hydrogen_treatment     'mixed'
_refine_ls_extinction_method      none
_refine_ls_extinction_coef        ?
_refine_ls_number_reflns          2365
_refine_ls_number_parameters      117
_refine_ls_number_restraints      0
_refine_ls_R_factor_all           0.0499
_refine_ls_R_factor_obs           0.0463
_refine_ls_wR_factor_all          0.1306
_refine_ls_wR_factor_obs          0.1285
_refine_ls_goodness_of_fit_all    1.156
_refine_ls_goodness_of_fit_obs    1.203
_refine_ls_restrained_S_all       1.156
_refine_ls_restrained_S_obs       1.203
_refine_ls_shift/esd_max          0.012
_refine_ls_shift/esd_mean         0.001

loop_
 _atom_site_label
 _atom_site_type_symbol
 _atom_site_fract_x
 _atom_site_fract_y
 _atom_site_fract_z
 _atom_site_U_iso_or_equiv
 _atom_site_thermal_displace_type
 _atom_site_occupancy
 _atom_site_calc_flag
 _atom_site_refinement_flags
 _atom_site_disorder_group
Ni1 Ni 0.0000 0.11537(4) 0.7500 0.0349(2) Uani 1 d S .
C1 C 0.1221(2) 0.1242(3) 0.7243(3) 0.0409(7) Uani 1 d . .
H1* H 0.1220(21) 0.2019(31) 0.7246(26) 0.043(9) Uiso 1 d . .
C2 C 0.0780(2) 0.0761(3) 0.6408(2) 0.0433(7) Uani 1 d . .
H2* H 0.0885(28) -0.0152(37) 0.6283(36) 0.078(13) Uiso 1 d . .
C3 C 0.0108(2) 0.1273(3) 0.5904(2) 0.0411(7) Uani 1 d . .
H3* H -0.0322(24) 0.0832(30) 0.5413(30) 0.053(10) Uiso 1 d . .
Si1 Si 0.20320(5) 0.05156(8) 0.79865(7) 0.0457(3) Uani 1 d . .
C11 C 0.1775(3) -0.0933(4) 0.8084(6) 0.119(3) Uani 1 d . .
H11A H 0.1277(3) -0.1014(4) 0.8453(6) 0.179 Uiso 1 calc R .
H11B H 0.2197(3) -0.1304(4) 0.8461(6) 0.179 Uiso 1 calc R .
H11C H 0.1718(3) -0.1232(4) 0.7390(6) 0.179 Uiso 1 calc R .
C12 C 0.2187(3) 0.1110(5) 0.9323(3) 0.084(2) Uani 1 d . .
H12A H 0.2320(3) 0.1858(5) 0.9258(3) 0.125 Uiso 1 calc R .
H12B H 0.2619(3) 0.0740(5) 0.9681(3) 0.125 Uiso 1 calc R .
H12C H 0.1701(3) 0.1037(5) 0.9719(3) 0.125 Uiso 1 calc R .
C13 C 0.2998(2) 0.0689(4) 0.7275(3) 0.0655(10) Uani 1 d . .
H13A H 0.3125(2) 0.1441(4) 0.7229(3) 0.098 Uiso 1 calc R .
H13B H 0.2944(2) 0.0394(4) 0.6579(3) 0.098 Uiso 1 calc R .
H13C H 0.3422(2) 0.0322(4) 0.7651(3) 0.098 Uiso 1 calc R .
Si3 Si 0.00681(5) 0.26952(7) 0.54157(7) 0.0437(3) Uani 1 d . .
C31 C -0.0664(3) 0.3577(3) 0.6128(3) 0.0598(9) Uani 1 d . .
H31A H -0.0505(3) 0.3630(3) 0.6856(3) 0.090 Uiso 1 calc R .
H31B H -0.1195(3) 0.3271(3) 0.6076(3) 0.090 Uiso 1 calc R .
H31C H -0.0667(3) 0.4281(3) 0.5817(3) 0.090 Uiso 1 calc R .
C32 C 0.1095(3) 0.3349(4) 0.5476(3) 0.0665(11) Uani 1 d . .
H32A H 0.1281(3) 0.3381(4) 0.6195(3) 0.100 Uiso 1 calc R .
H32B H 0.1060(3) 0.4064(4) 0.5193(3) 0.100 Uiso 1 calc R .
H32C H 0.1467(3) 0.2934(4) 0.5070(3) 0.100 Uiso 1 calc R .
C33 C -0.0288(3) 0.2636(4) 0.4011(3) 0.0671(11) Uani 1 d . .
H33A H -0.0318(3) 0.3352(4) 0.3728(3) 0.101 Uiso 1 calc R .
H33B H -0.0813(3) 0.2310(4) 0.3976(3) 0.101 Uiso 1 calc R .
H33C H 0.0083(3) 0.2217(4) 0.3608(3) 0.101 Uiso 1 calc R .

loop_
 _atom_site_aniso_label
 _atom_site_aniso_U_11
 _atom_site_aniso_U_22
 _atom_site_aniso_U_33
 _atom_site_aniso_U_23
 _atom_site_aniso_U_13
 _atom_site_aniso_U_12
Ni1 0.0325(3) 0.0357(3) 0.0363(3) 0.000 -0.0017(2) 0.000
C1 0.0351(15) 0.043(2) 0.045(2) -0.0010(12) 0.0017(12) 0.0006(12)
C2 0.041(2) 0.047(2) 0.042(2) -0.0027(14) 0.0020(13) 0.0074(14)
C3 0.042(2) 0.045(2) 0.036(2) -0.0031(12) -0.0012(12) 0.0060(13)
Si1 0.0356(4) 0.0479(5) 0.0534(5) 0.0049(4) -0.0064(4) 0.0002(4)
C11 0.082(3) 0.058(3) 0.216(8) 0.053(4) -0.078(4) -0.023(3)
C12 0.054(2) 0.144(5) 0.052(2) -0.002(2) -0.014(2) 0.017(3)
C13 0.044(2) 0.083(3) 0.070(2) -0.001(2) 0.004(2) 0.015(2)
Si3 0.0470(5) 0.0468(5) 0.0373(4) 0.0038(4) -0.0007(3) 0.0051(4)
C31 0.071(2) 0.049(2) 0.060(2) 0.004(2) 0.006(2) 0.016(2)
C32 0.066(2) 0.069(3) 0.065(2) 0.020(2) -0.002(2) -0.013(2)
C33 0.075(3) 0.080(3) 0.046(2) 0.008(2) -0.009(2) 0.013(2)

_geom_special_details
;
 All esds (except the esd in the dihedral angle between two l.s. planes)
 are estimated using the full covariance matrix.  The cell esds are taken
 into account individually in the estimation of esds in distances, angles
 and torsion angles; correlations between esds in cell parameters are only
 used when they are defined by crystal symmetry.  An approximate (isotropic)
 treatment of cell esds is used for estimating esds involving l.s. planes.
;

loop_
 _geom_bond_atom_site_label_1
 _geom_bond_atom_site_label_2
 _geom_bond_distance
 _geom_bond_site_symmetry_2
 _geom_bond_publ_flag
Ni1 C2 1.972(3) 2_556 ?
Ni1 C2 1.972(3) . ?
Ni1 C3 2.042(3) 2_556 ?
Ni1 C3 2.042(3) . ?
Ni1 C1 2.057(3) . ?
Ni1 C1 2.057(3) 2_556 ?
C1 C2 1.411(5) . ?
C1 Si1 1.865(3) . ?
C1 H1* 0.97(4) . ?
C2 C3 1.427(4) . ?
C2 H2* 1.16(5) . ?
C3 Si3 1.875(3) . ?
C3 H3* 1.09(4) . ?
Si1 C11 1.855(5) . ?
Si1 C13 1.862(4) . ?
Si1 C12 1.866(5) . ?
C11 H11A 0.96 . ?
C11 H11B 0.96 . ?
C11 H11C 0.96 . ?
C12 H12A 0.96 . ?
C12 H12B 0.96 . ?
C12 H12C 0.96 . ?
C13 H13A 0.96 . ?
C13 H13B 0.96 . ?
C13 H13C 0.96 . ?
Si3 C33 1.873(4) . ?
Si3 C31 1.878(4) . ?
Si3 C32 1.887(4) . ?
C31 H31A 0.96 . ?
C31 H31B 0.96 . ?
C31 H31C 0.96 . ?
C32 H32A 0.96 . ?
C32 H32B 0.96 . ?
C32 H32C 0.96 . ?
C33 H33A 0.96 . ?
C33 H33B 0.96 . ?
C33 H33C 0.96 . ?

loop_
 _geom_angle_atom_site_label_1
 _geom_angle_atom_site_label_2
 _geom_angle_atom_site_label_3
 _geom_angle
 _geom_angle_site_symmetry_1
 _geom_angle_site_symmetry_3
 _geom_angle_publ_flag
C2 Ni1 C2 151.3(2) 2_556 . ?
C2 Ni1 C3 41.60(13) 2_556 2_556 ?
C2 Ni1 C3 141.60(13) . 2_556 ?
C2 Ni1 C3 141.60(13) 2_556 . ?
C2 Ni1 C3 41.60(13) . . ?
C3 Ni1 C3 171.7(2) 2_556 . ?
C2 Ni1 C1 141.42(13) 2_556 . ?
C2 Ni1 C1 40.93(13) . . ?
C3 Ni1 C1 104.72(13) 2_556 . ?
C3 Ni1 C1 74.82(13) . . ?
C2 Ni1 C1 40.93(13) 2_556 2_556 ?
C2 Ni1 C1 141.42(13) . 2_556 ?
C3 Ni1 C1 74.82(13) 2_556 2_556 ?
C3 Ni1 C1 104.72(13) . 2_556 ?
C1 Ni1 C1 173.9(2) . 2_556 ?
C2 C1 Si1 122.5(2) . . ?
C2 C1 Ni1 66.3(2) . . ?
Si1 C1 Ni1 126.7(2) . . ?
C2 C1 H1* 115.2(21) . . ?
Si1 C1 H1* 118.8(21) . . ?
Ni1 C1 H1* 93.0(21) . . ?
C1 C2 C3 122.7(3) . . ?
C1 C2 Ni1 72.8(2) . . ?
C3 C2 Ni1 71.8(2) . . ?
C1 C2 H2* 116.1(24) . . ?
C3 C2 H2* 119.5(24) . . ?
Ni1 C2 H2* 116.1(23) . . ?
C2 C3 Si3 126.3(3) . . ?
C2 C3 Ni1 66.6(2) . . ?
Si3 C3 Ni1 113.2(2) . . ?
C2 C3 H3* 122.2(20) . . ?
Si3 C3 H3* 105.4(20) . . ?
Ni1 C3 H3* 117.8(20) . . ?
C11 Si1 C13 110.2(3) . . ?
C11 Si1 C12 110.6(3) . . ?
C13 Si1 C12 106.7(2) . . ?
C11 Si1 C1 109.8(2) . . ?
C13 Si1 C1 108.5(2) . . ?
C12 Si1 C1 111.0(2) . . ?
Si1 C11 H11A 109.5(2) . . ?
Si1 C11 H11B 109.5(2) . . ?
H11A C11 H11B 109.5 . . ?
Si1 C11 H11C 109.5(3) . . ?
H11A C11 H11C 109.5 . . ?
H11B C11 H11C 109.5 . . ?
Si1 C12 H12A 109.5(2) . . ?
Si1 C12 H12B 109.5(2) . . ?
H12A C12 H12B 109.5 . . ?
Si1 C12 H12C 109.5(2) . . ?
H12A C12 H12C 109.5 . . ?
H12B C12 H12C 109.5 . . ?
Si1 C13 H13A 109.47(15) . . ?
Si1 C13 H13B 109.47(15) . . ?
H13A C13 H13B 109.5 . . ?
Si1 C13 H13C 109.47(14) . . ?
H13A C13 H13C 109.5 . . ?
H13B C13 H13C 109.5 . . ?
C33 Si3 C3 106.7(2) . . ?
C33 Si3 C31 106.6(2) . . ?
C3 Si3 C31 114.3(2) . . ?
C33 Si3 C32 109.1(2) . . ?
C3 Si3 C32 111.4(2) . . ?
C31 Si3 C32 108.6(2) . . ?
Si3 C31 H31A 109.47(13) . . ?
Si3 C31 H31B 109.47(14) . . ?
H31A C31 H31B 109.5 . . ?
Si3 C31 H31C 109.47(13) . . ?
H31A C31 H31C 109.5 . . ?
H31B C31 H31C 109.5 . . ?
Si3 C32 H32A 109.47(14) . . ?
Si3 C32 H32B 109.47(14) . . ?
H32A C32 H32B 109.5 . . ?
Si3 C32 H32C 109.5(2) . . ?
H32A C32 H32C 109.5 . . ?
H32B C32 H32C 109.5 . . ?
Si3 C33 H33A 109.47(15) . . ?
Si3 C33 H33B 109.47(15) . . ?
H33A C33 H33B 109.5 . . ?
Si3 C33 H33C 109.47(14) . . ?
H33A C33 H33C 109.5 . . ?
H33B C33 H33C 109.5 . . ?

_refine_diff_density_max    0.431
_refine_diff_density_min   -0.482
_refine_diff_density_rms    0.066

#===END

data_marks5

_audit_creation_method            SHELXL
_chemical_name_systematic
;
 ?
;
_chemical_name_common             5
_chemical_formula_moiety          ?
_chemical_formula_structural      ?
_chemical_formula_analytical      ?
_chemical_formula_sum             'C15 H36 Cl3 N2 Si2 Ta'
_chemical_formula_weight          587.94
_chemical_melting_point           ?
_chemical_compound_source         ?

loop_
 _atom_type_symbol
 _atom_type_description
 _atom_type_scat_dispersion_real
 _atom_type_scat_dispersion_imag
 _atom_type_scat_source
 'C'  'C'   0.0033   0.0016
 'International Tables Vol C Tables 4.2.6.8 and 6.1.1.4'
 'H'  'H'   0.0000   0.0000
 'International Tables Vol C Tables 4.2.6.8 and 6.1.1.4'
 'N'  'N'   0.0061   0.0033
 'International Tables Vol C Tables 4.2.6.8 and 6.1.1.4'
 'Si'  'Si'   0.0817   0.0704
 'International Tables Vol C Tables 4.2.6.8 and 6.1.1.4'
 'Cl'  'Cl'   0.1484   0.1585
 'International Tables Vol C Tables 4.2.6.8 and 6.1.1.4'
 'Ta'  'Ta'  -0.7052   6.5227
 'International Tables Vol C Tables 4.2.6.8 and 6.1.1.4'

_symmetry_cell_setting            'Monoclinic'
_symmetry_space_group_name_H-M    'P2(1)/c'

loop_
 _symmetry_equiv_pos_as_xyz
 'x, y, z'
 '-x, y+1/2, -z+1/2'
 '-x, -y, -z'
 'x, -y-1/2, z-1/2'

_cell_length_a                    18.928(4)
_cell_length_b                    9.059(2)
_cell_length_c                    14.410(3)
_cell_angle_alpha                 90.00
_cell_angle_beta                  100.39(3)
_cell_angle_gamma                 90.00
_cell_volume                      2430.4(8)
_cell_formula_units_Z             4
_cell_measurement_temperature     140(1)
_cell_measurement_reflns_used     ?
_cell_measurement_theta_min       ?
_cell_measurement_theta_max       ?

_exptl_crystal_description        'block'
_exptl_crystal_colour             'dark blue-green'
_exptl_crystal_size_max           0.4
_exptl_crystal_size_mid           0.4
_exptl_crystal_size_min           0.3
_exptl_crystal_density_meas       ?
_exptl_crystal_density_diffrn     1.607
_exptl_crystal_density_method     ?
_exptl_crystal_F_000              1168
_exptl_absorpt_coefficient_mu     4.952
_exptl_absorpt_correction_type    'none'
_exptl_absorpt_correction_T_min   ?
_exptl_absorpt_correction_T_max   ?

_exptl_special_details
;
 ?
;

_diffrn_ambient_temperature       140(1)
_diffrn_radiation_wavelength      0.71073
_diffrn_radiation_type            MoK\a
_diffrn_radiation_source          'rotating anode'
_diffrn_radiation_monochromator   graphite
_diffrn_measurement_device        'Rigaku R-Axis-IIc'
_diffrn_measurement_method        'image-plate oscillation photos'
_diffrn_standards_number          ?
_diffrn_standards_interval_count  ?
_diffrn_standards_interval_time   ?
_diffrn_standards_decay_%         0
_diffrn_reflns_number             8386
_diffrn_reflns_av_R_equivalents   0.0667
_diffrn_reflns_av_sigmaI/netI     0.0654
_diffrn_reflns_limit_h_min        -22
_diffrn_reflns_limit_h_max        22
_diffrn_reflns_limit_k_min        -10
_diffrn_reflns_limit_k_max        10
_diffrn_reflns_limit_l_min        -17
_diffrn_reflns_limit_l_max        17
_diffrn_reflns_theta_min          2.78
_diffrn_reflns_theta_max          25.35
_reflns_number_total              4397
_reflns_number_observed           4301
_reflns_observed_criterion        >2sigma(I)

_computing_data_collection        'MSC R-Axis-II control software'
_computing_cell_refinement        'DENZO (Otwinowski and Minor, 1985)'
_computing_data_reduction
;
 DENZO, Scalepack (Otwinowski and Minor, 1985)
;
_computing_structure_solution     'XS (SHELXTL, v.5, 1994)'
_computing_structure_refinement   'XL (SHELXTL, v.5, 1994)'
_computing_molecular_graphics     'XP (SHELXTL, v.5, 1994)'
_computing_publication_material   'XL (SHELXTL, v.5, 1994)'

_refine_special_details
;
 Refinement on F^2^ for ALL reflections except for 0 with very negative F^2^
 or flagged by the user for potential systematic errors.  Weighted R-factors
 wR and all goodnesses of fit S are based on F^2^, conventional R-factors R
 are based on F, with F set to zero for negative F^2^. The observed criterion
 of F^2^ > 2sigma(F^2^) is used only for calculating _R_factor_obs etc. and is
 not relevant to the choice of reflections for refinement.  R-factors based
 on F^2^ are statistically about twice as large as those based on F, and R-
 factors based on ALL data will be even larger.
;

_refine_ls_structure_factor_coef  Fsqd
_refine_ls_matrix_type            full
_refine_ls_weighting_scheme
 'calc w=1/[\s^2^(Fo^2^)+(0.0000P)^2^+12.6230P] where P=(Fo^2^+2Fc^2^)/3'
_atom_sites_solution_primary      direct
_atom_sites_solution_secondary    difmap
_atom_sites_solution_hydrogens    geom
_refine_ls_hydrogen_treatment     'constr'
_refine_ls_extinction_method      none
_refine_ls_extinction_coef        ?
_refine_ls_number_reflns          4397
_refine_ls_number_parameters      235
_refine_ls_number_restraints      0
_refine_ls_R_factor_all           0.0353
_refine_ls_R_factor_obs           0.0346
_refine_ls_wR_factor_all          0.1015
_refine_ls_wR_factor_obs          0.1012
_refine_ls_goodness_of_fit_all    1.255
_refine_ls_goodness_of_fit_obs    1.265
_refine_ls_restrained_S_all       1.255
_refine_ls_restrained_S_obs       1.265
_refine_ls_shift/esd_max          0.001
_refine_ls_shift/esd_mean         0.000

loop_
 _atom_site_label
 _atom_site_type_symbol
 _atom_site_fract_x
 _atom_site_fract_y
 _atom_site_fract_z
 _atom_site_U_iso_or_equiv
 _atom_site_thermal_displace_type
 _atom_site_occupancy
 _atom_site_calc_flag
 _atom_site_refinement_flags
 _atom_site_disorder_group
Ta1 Ta 0.336145(12) 0.65215(3) 0.524011(14) 0.02373(11) Uani 1 d . .
Cl1 Cl 0.43313(8) 0.6247(2) 0.44351(10) 0.0340(4) Uani 1 d . .
Cl2 Cl 0.30261(9) 0.8842(2) 0.45153(10) 0.0322(3) Uani 1 d . .
Cl3 Cl 0.37716(9) 0.4517(2) 0.62576(10) 0.0382(4) Uani 1 d . .
Si1 Si 0.25654(10) 0.3576(2) 0.41360(12) 0.0296(4) Uani 1 d . .
C11 C 0.3467(4) 0.2854(10) 0.4016(5) 0.040(2) Uani 1 d . .
H11A H 0.3659(4) 0.3441(10) 0.3565(5) 0.061 Uiso 1 calc R .
H11B H 0.3423(4) 0.1848(10) 0.3804(5) 0.061 Uiso 1 calc R .
H11C H 0.3783(4) 0.2901(10) 0.4616(5) 0.061 Uiso 1 calc R .
C12 C 0.2019(4) 0.3242(11) 0.2917(5) 0.050(2) Uani 1 d . .
H12A H 0.2218(4) 0.3805(11) 0.2461(5) 0.075 Uiso 1 calc R .
H12B H 0.1531(4) 0.3542(11) 0.2905(5) 0.075 Uiso 1 calc R .
H12C H 0.2031(4) 0.2211(11) 0.2766(5) 0.075 Uiso 1 calc R .
C13 C 0.2168(4) 0.2474(10) 0.5003(5) 0.046(2) Uani 1 d . .
H13A H 0.1705(4) 0.2869(10) 0.5051(5) 0.069 Uiso 1 calc R .
H13B H 0.2478(4) 0.2520(10) 0.5609(5) 0.069 Uiso 1 calc R .
H13C H 0.2117(4) 0.1466(10) 0.4797(5) 0.069 Uiso 1 calc R .
N1 N 0.2694(3) 0.7210(7) 0.6418(3) 0.0274(12) Uani 1 d . .
C21 C 0.3204(4) 0.7835(9) 0.7254(4) 0.036(2) Uani 1 d . .
H21A H 0.3478(4) 0.7041(9) 0.7599(4) 0.043 Uiso 1 calc R .
H21B H 0.2933(4) 0.8325(9) 0.7675(4) 0.043 Uiso 1 calc R .
C211 C 0.2114(4) 0.8325(9) 0.6110(4) 0.039(2) Uani 1 d . .
H21C H 0.2319(4) 0.9196(9) 0.5887(4) 0.058 Uiso 1 calc R .
H21D H 0.1888(4) 0.8576(9) 0.6635(4) 0.058 Uiso 1 calc R .
H21E H 0.1762(4) 0.7917(9) 0.5612(4) 0.058 Uiso 1 calc R .
C212 C 0.2318(4) 0.5911(9) 0.6749(5) 0.039(2) Uani 1 d . .
H21F H 0.2661(4) 0.5147(9) 0.6959(5) 0.059 Uiso 1 calc R .
H21G H 0.1963(4) 0.5548(9) 0.6239(5) 0.059 Uiso 1 calc R .
H21H H 0.2088(4) 0.6207(9) 0.7262(5) 0.059 Uiso 1 calc R .
N2 N 0.4169(3) 0.8211(8) 0.6331(4) 0.0358(14) Uani 1 d . .
C22 C 0.3717(4) 0.8936(10) 0.6921(4) 0.038(2) Uani 1 d . .
H22A H 0.3441(4) 0.9717(10) 0.6563(4) 0.046 Uiso 1 calc R .
H22B H 0.4019(4) 0.9379(10) 0.7464(4) 0.046 Uiso 1 calc R .
C221 C 0.4753(4) 0.7339(11) 0.6947(5) 0.046(2) Uani 1 d . .
H22C H 0.5048(4) 0.6866(11) 0.6559(5) 0.069 Uiso 1 calc R .
H22D H 0.4540(4) 0.6605(11) 0.7290(5) 0.069 Uiso 1 calc R .
H22E H 0.5043(4) 0.7993(11) 0.7383(5) 0.069 Uiso 1 calc R .
C222 C 0.4548(4) 0.9354(11) 0.5867(5) 0.053(2) Uani 1 d . .
H22F H 0.4845(4) 0.8883(11) 0.5480(5) 0.079 Uiso 1 calc R .
H22G H 0.4843(4) 0.9943(11) 0.6339(5) 0.079 Uiso 1 calc R .
H22H H 0.4202(4) 0.9974(11) 0.5482(5) 0.079 Uiso 1 calc R .
C1 C 0.2535(3) 0.5618(8) 0.4433(4) 0.0285(14) Uani 1 d . .
C2 C 0.1837(3) 0.6319(8) 0.4027(4) 0.0285(14) Uani 1 d . .
H2 H 0.1877(3) 0.7196(8) 0.3704(4) 0.034 Uiso 1 calc R .
C3 C 0.1171(4) 0.5909(11) 0.4046(7) 0.055(2) Uani 1 d . .
H3 H 0.1097(4) 0.4983(11) 0.4291(7) 0.066 Uiso 1 calc R .
Si3 Si 0.03692(12) 0.7079(4) 0.3612(2) 0.0686(9) Uani 1 d . .
C31' C 0.0648(9) 0.9101(22) 0.3693(10) 0.055(5) Uani 0.50 d P .
H31A H 0.0737(9) 0.9404(22) 0.4342(10) 0.083 Uiso 0.50 calc PR .
H31B H 0.0270(9) 0.9693(22) 0.3345(10) 0.083 Uiso 0.50 calc PR .
H31C H 0.1077(9) 0.9225(22) 0.3433(10) 0.083 Uiso 0.50 calc PR .
C32' C -0.0452(20) 0.6547(49) 0.3994(25) 0.081(15) Uani 0.50 d P .
H32A H -0.0344(20) 0.6203(49) 0.4634(25) 0.121 Uiso 0.50 calc PR .
H32B H -0.0681(20) 0.5772(49) 0.3595(25) 0.121 Uiso 0.50 calc PR .
H32C H -0.0768(20) 0.7383(49) 0.3956(25) 0.121 Uiso 0.50 calc PR .
C33' C 0.0123(9) 0.6924(24) 0.2113(10) 0.054(5) Uani 0.50 d P .
H33A H -0.0123(9) 0.6011(24) 0.1936(10) 0.081 Uiso 0.50 calc PR .
H33B H 0.0559(9) 0.6955(24) 0.1863(10) 0.081 Uiso 0.50 calc PR .
H33C H -0.0180(9) 0.7736(24) 0.1865(10) 0.081 Uiso 0.50 calc PR .
C31 C -0.0408(19) 0.5935(49) 0.3772(21) 0.067(10) Uani 0.50 d P .
H31D H -0.0352(19) 0.5627(49) 0.4418(21) 0.101 Uiso 0.50 calc PR .
H31E H -0.0435(19) 0.5082(49) 0.3372(21) 0.101 Uiso 0.50 calc PR .
H31F H -0.0842(19) 0.6502(49) 0.3609(21) 0.101 Uiso 0.50 calc PR .
C32 C 0.0376(9) 0.7706(21) 0.2571(8) 0.043(4) Uani 0.50 d P .
H32D H 0.0861(9) 0.7924(21) 0.2505(8) 0.064 Uiso 0.50 calc PR .
H32E H 0.0092(9) 0.8590(21) 0.2473(8) 0.064 Uiso 0.50 calc PR .
H32F H 0.0178(9) 0.6979(21) 0.2112(8) 0.064 Uiso 0.50 calc PR .
C33 C 0.0276(10) 0.8600(20) 0.4628(10) 0.052(5) Uani 0.50 d P .
H33D H 0.0278(10) 0.8106(20) 0.5218(10) 0.078 Uiso 0.50 calc PR .
H33E H -0.0166(10) 0.9133(20) 0.4451(10) 0.078 Uiso 0.50 calc PR .
H33F H 0.0672(10) 0.9277(20) 0.4692(10) 0.078 Uiso 0.50 calc PR .

loop_
 _atom_site_aniso_label
 _atom_site_aniso_U_11
 _atom_site_aniso_U_22
 _atom_site_aniso_U_33
 _atom_site_aniso_U_23
 _atom_site_aniso_U_13
 _atom_site_aniso_U_12
Ta1 0.0249(2) 0.0283(2) 0.01787(14) 0.00198(9) 0.00342(9) 0.00087(10)
Cl1 0.0277(7) 0.0460(11) 0.0300(7) -0.0009(7) 0.0096(6) 0.0006(8)
Cl2 0.0472(9) 0.0245(8) 0.0254(6) 0.0029(6) 0.0080(6) 0.0031(8)
Cl3 0.0409(9) 0.0408(11) 0.0309(7) 0.0124(7) 0.0009(6) 0.0091(8)
Si1 0.0303(9) 0.0265(11) 0.0331(8) -0.0010(7) 0.0086(7) 0.0012(8)
C11 0.040(4) 0.038(5) 0.047(4) -0.006(3) 0.018(3) 0.005(4)
C12 0.053(5) 0.043(5) 0.051(4) -0.016(4) 0.003(3) -0.001(4)
C13 0.051(4) 0.032(5) 0.060(4) 0.007(4) 0.028(4) 0.002(4)
N1 0.029(3) 0.034(4) 0.020(2) -0.004(2) 0.009(2) 0.000(3)
C21 0.045(4) 0.043(5) 0.020(3) -0.005(3) 0.007(2) -0.009(4)
C211 0.040(4) 0.048(5) 0.028(3) -0.001(3) 0.007(3) 0.008(4)
C212 0.046(4) 0.040(5) 0.038(3) -0.002(3) 0.021(3) -0.013(4)
N2 0.034(3) 0.045(4) 0.027(3) 0.001(3) 0.004(2) -0.010(3)
C22 0.046(4) 0.044(5) 0.023(3) -0.007(3) 0.004(3) -0.008(4)
C221 0.033(3) 0.068(6) 0.032(3) -0.007(4) -0.009(3) -0.003(4)
C222 0.056(5) 0.061(6) 0.042(4) -0.006(4) 0.014(3) -0.033(5)
C1 0.035(3) 0.029(4) 0.023(3) 0.002(2) 0.009(2) 0.006(3)
C2 0.029(3) 0.033(4) 0.022(3) -0.001(2) 0.002(2) 0.005(3)
C3 0.028(4) 0.036(5) 0.100(6) 0.005(5) 0.007(4) 0.005(4)
Si3 0.0285(11) 0.045(2) 0.123(2) -0.020(2) -0.0111(12) 0.0132(12)
C31' 0.064(10) 0.059(13) 0.036(7) -0.009(8) -0.008(7) 0.033(10)
C32' 0.028(10) 0.150(42) 0.075(20) 0.052(22) 0.041(13) 0.053(21)
C33' 0.056(10) 0.068(13) 0.032(7) -0.010(8) -0.006(7) 0.002(10)
C31 0.030(13) 0.130(31) 0.042(12) 0.023(13) 0.011(9) 0.049(14)
C32 0.062(9) 0.062(12) 0.006(5) 0.017(6) 0.013(5) 0.012(9)
C33 0.074(11) 0.053(12) 0.030(7) -0.008(7) 0.010(7) 0.022(9)

_geom_special_details
;
 All esds (except the esd in the dihedral angle between two l.s. planes)
 are estimated using the full covariance matrix.  The cell esds are taken
 into account individually in the estimation of esds in distances, angles
 and torsion angles; correlations between esds in cell parameters are only
 used when they are defined by crystal symmetry.  An approximate (isotropic)
 treatment of cell esds is used for estimating esds involving l.s. planes.
;

loop_
 _geom_bond_atom_site_label_1
 _geom_bond_atom_site_label_2
 _geom_bond_distance
 _geom_bond_site_symmetry_2
 _geom_bond_publ_flag
Ta1 C1 1.953(7) . ?
Ta1 Cl1 2.355(2) . ?
Ta1 N1 2.374(5) . ?
Ta1 Cl3 2.374(2) . ?
Ta1 Cl2 2.382(2) . ?
Ta1 N2 2.507(6) . ?
Si1 C13 1.860(7) . ?
Si1 C11 1.865(7) . ?
Si1 C12 1.896(7) . ?
Si1 C1 1.902(7) . ?
C11 H11A 0.96 . ?
C11 H11B 0.96 . ?
C11 H11C 0.96 . ?
C12 H12A 0.96 . ?
C12 H12B 0.96 . ?
C12 H12C 0.96 . ?
C13 H13A 0.96 . ?
C13 H13B 0.96 . ?
C13 H13C 0.96 . ?
N1 C212 1.498(9) . ?
N1 C211 1.500(9) . ?
N1 C21 1.511(8) . ?
C21 C22 1.527(10) . ?
C21 H21A 0.97 . ?
C21 H21B 0.97 . ?
C211 H21C 0.96 . ?
C211 H21D 0.96 . ?
C211 H21E 0.96 . ?
C212 H21F 0.96 . ?
C212 H21G 0.96 . ?
C212 H21H 0.96 . ?
N2 C22 1.465(9) . ?
N2 C222 1.486(9) . ?
N2 C221 1.511(9) . ?
C22 H22A 0.97 . ?
C22 H22B 0.97 . ?
C221 H22C 0.96 . ?
C221 H22D 0.96 . ?
C221 H22E 0.96 . ?
C222 H22F 0.96 . ?
C222 H22G 0.96 . ?
C222 H22H 0.96 . ?
C1 C2 1.488(9) . ?
C2 C3 1.320(10) . ?
C2 H2 0.93 . ?
C3 Si3 1.864(8) . ?
C3 H3 0.93 . ?
Si3 C32 1.606(11) . ?
Si3 C32' 1.81(4) . ?
Si3 C31 1.85(5) . ?
Si3 C31' 1.90(2) . ?
Si3 C33 2.041(15) . ?
Si3 C33' 2.130(15) . ?
C31' H31A 0.96 . ?
C31' H31B 0.96 . ?
C31' H31C 0.96 . ?
C32' H32A 0.96 . ?
C32' H32B 0.96 . ?
C32' H32C 0.96 . ?
C33' H33A 0.96 . ?
C33' H33B 0.96 . ?
C33' H33C 0.96 . ?
C31 H31D 0.96 . ?
C31 H31E 0.96 . ?
C31 H31F 0.96 . ?
C32 H32D 0.96 . ?
C32 H32E 0.96 . ?
C32 H32F 0.96 . ?
C33 H33D 0.96 . ?
C33 H33E 0.96 . ?
C33 H33F 0.96 . ?

loop_
 _geom_angle_atom_site_label_1
 _geom_angle_atom_site_label_2
 _geom_angle_atom_site_label_3
 _geom_angle
 _geom_angle_site_symmetry_1
 _geom_angle_site_symmetry_3
 _geom_angle_publ_flag
C1 Ta1 Cl1 105.9(2) . . ?
C1 Ta1 N1 93.6(2) . . ?
Cl1 Ta1 N1 160.42(13) . . ?
C1 Ta1 Cl3 100.6(2) . . ?
Cl1 Ta1 Cl3 91.50(6) . . ?
N1 Ta1 Cl3 85.19(14) . . ?
C1 Ta1 Cl2 89.3(2) . . ?
Cl1 Ta1 Cl2 92.70(6) . . ?
N1 Ta1 Cl2 87.00(15) . . ?
Cl3 Ta1 Cl2 167.73(6) . . ?
C1 Ta1 N2 164.1(2) . . ?
Cl1 Ta1 N2 86.13(14) . . ?
N1 Ta1 N2 74.6(2) . . ?
Cl3 Ta1 N2 89.2(2) . . ?
Cl2 Ta1 N2 79.6(2) . . ?
C13 Si1 C11 111.2(4) . . ?
C13 Si1 C12 108.5(4) . . ?
C11 Si1 C12 102.3(4) . . ?
C13 Si1 C1 109.8(3) . . ?
C11 Si1 C1 115.3(3) . . ?
C12 Si1 C1 109.3(3) . . ?
Si1 C11 H11A 109.5(3) . . ?
Si1 C11 H11B 109.5(3) . . ?
H11A C11 H11B 109.5 . . ?
Si1 C11 H11C 109.5(2) . . ?
H11A C11 H11C 109.5 . . ?
H11B C11 H11C 109.5 . . ?
Si1 C12 H12A 109.5(3) . . ?
Si1 C12 H12B 109.5(3) . . ?
H12A C12 H12B 109.5 . . ?
Si1 C12 H12C 109.5(3) . . ?
H12A C12 H12C 109.5 . . ?
H12B C12 H12C 109.5 . . ?
Si1 C13 H13A 109.5(3) . . ?
Si1 C13 H13B 109.5(3) . . ?
H13A C13 H13B 109.5 . . ?
Si1 C13 H13C 109.5(3) . . ?
H13A C13 H13C 109.5 . . ?
H13B C13 H13C 109.5 . . ?
C212 N1 C211 104.9(5) . . ?
C212 N1 C21 108.2(5) . . ?
C211 N1 C21 108.2(6) . . ?
C212 N1 Ta1 111.5(4) . . ?
C211 N1 Ta1 114.9(4) . . ?
C21 N1 Ta1 108.8(4) . . ?
N1 C21 C22 110.2(5) . . ?
N1 C21 H21A 109.6(4) . . ?
C22 C21 H21A 109.6(4) . . ?
N1 C21 H21B 109.6(3) . . ?
C22 C21 H21B 109.6(4) . . ?
H21A C21 H21B 108.1 . . ?
N1 C211 H21C 109.5(4) . . ?
N1 C211 H21D 109.5(3) . . ?
H21C C211 H21D 109.5 . . ?
N1 C211 H21E 109.5(4) . . ?
H21C C211 H21E 109.5 . . ?
H21D C211 H21E 109.5 . . ?
N1 C212 H21F 109.5(4) . . ?
N1 C212 H21G 109.5(3) . . ?
H21F C212 H21G 109.5 . . ?
N1 C212 H21H 109.5(3) . . ?
H21F C212 H21H 109.5 . . ?
H21G C212 H21H 109.5 . . ?
C22 N2 C222 109.2(7) . . ?
C22 N2 C221 109.6(5) . . ?
C222 N2 C221 105.4(6) . . ?
C22 N2 Ta1 106.5(4) . . ?
C222 N2 Ta1 115.6(4) . . ?
C221 N2 Ta1 110.4(5) . . ?
N2 C22 C21 111.1(7) . . ?
N2 C22 H22A 109.4(4) . . ?
C21 C22 H22A 109.4(4) . . ?
N2 C22 H22B 109.4(3) . . ?
C21 C22 H22B 109.4(3) . . ?
H22A C22 H22B 108.0 . . ?
N2 C221 H22C 109.5(4) . . ?
N2 C221 H22D 109.5(4) . . ?
H22C C221 H22D 109.5 . . ?
N2 C221 H22E 109.5(4) . . ?
H22C C221 H22E 109.5 . . ?
H22D C221 H22E 109.5 . . ?
N2 C222 H22F 109.5(5) . . ?
N2 C222 H22G 109.5(4) . . ?
H22F C222 H22G 109.5 . . ?
N2 C222 H22H 109.5(4) . . ?
H22F C222 H22H 109.5 . . ?
H22G C222 H22H 109.5 . . ?
C2 C1 Si1 112.8(5) . . ?
C2 C1 Ta1 127.9(5) . . ?
Si1 C1 Ta1 119.2(3) . . ?
C3 C2 C1 130.9(7) . . ?
C3 C2 H2 114.5(5) . . ?
C1 C2 H2 114.5(4) . . ?
C2 C3 Si3 123.7(7) . . ?
C2 C3 H3 118.1(5) . . ?
Si3 C3 H3 118.1(3) . . ?
C32 Si3 C32' 122.1(13) . . ?
C32 Si3 C31 117.1(12) . . ?
C32' Si3 C31 20.5(17) . . ?
C32 Si3 C3 111.8(6) . . ?
C32' Si3 C3 116.0(12) . . ?
C31 Si3 C3 104.9(10) . . ?
C32 Si3 C31' 70.6(8) . . ?
C32' Si3 C31' 118.8(14) . . ?
C31 Si3 C31' 138.6(11) . . ?
C3 Si3 C31' 109.1(6) . . ?
C32 Si3 C33 116.6(9) . . ?
C32' Si3 C33 76.7(14) . . ?
C31 Si3 C33 96.6(11) . . ?
C3 Si3 C33 108.3(6) . . ?
C31' Si3 C33 50.6(7) . . ?
C32 Si3 C33' 27.6(9) . . ?
C32' Si3 C33' 104.4(14) . . ?
C31 Si3 C33' 93.2(11) . . ?
C3 Si3 C33' 108.6(6) . . ?
C31' Si3 C33' 97.7(8) . . ?
C33 Si3 C33' 137.8(7) . . ?
Si3 C31' H31A 109.5(5) . . ?
Si3 C31' H31B 109.5(5) . . ?
H31A C31' H31B 109.5 . . ?
Si3 C31' H31C 109.5(5) . . ?
H31A C31' H31C 109.5 . . ?
H31B C31' H31C 109.5 . . ?
Si3 C32' H32A 109.5(12) . . ?
Si3 C32' H32B 109.5(13) . . ?
H32A C32' H32B 109.5 . . ?
Si3 C32' H32C 109.5(12) . . ?
H32A C32' H32C 109.5 . . ?
H32B C32' H32C 109.5 . . ?
Si3 C33' H33A 109.5(6) . . ?
Si3 C33' H33B 109.5(5) . . ?
H33A C33' H33B 109.5 . . ?
Si3 C33' H33C 109.5(6) . . ?
H33A C33' H33C 109.5 . . ?
H33B C33' H33C 109.5 . . ?
Si3 C31 H31D 109.5(10) . . ?
Si3 C31 H31E 109.5(9) . . ?
H31D C31 H31E 109.5 . . ?
Si3 C31 H31F 109.5(10) . . ?
H31D C31 H31F 109.5 . . ?
H31E C31 H31F 109.5 . . ?
Si3 C32 H32D 109.5(6) . . ?
Si3 C32 H32E 109.5(6) . . ?
H32D C32 H32E 109.5 . . ?
Si3 C32 H32F 109.5(7) . . ?
H32D C32 H32F 109.5 . . ?
H32E C32 H32F 109.5 . . ?
Si3 C33 H33D 109.5(5) . . ?
Si3 C33 H33E 109.5(5) . . ?
H33D C33 H33E 109.5 . . ?
Si3 C33 H33F 109.5(6) . . ?
H33D C33 H33F 109.5 . . ?
H33E C33 H33F 109.5 . . ?

_refine_diff_density_max    0.716
_refine_diff_density_min   -1.170
_refine_diff_density_rms    0.125

#===END


data_marks2

_audit_creation_method            SHELXL
_chemical_name_systematic
;
 ?
;
_chemical_name_common             6
_chemical_formula_moiety          'C15 H39 Si2 Sn2, Zr2 Cl9'
_chemical_formula_structural      '[Me3SiCH(SnMe3)CHCH(SnMe3)SiMe3][Zr2Cl9]'
_chemical_formula_analytical      ?
_chemical_formula_sum             'C15 H39 Cl9 Si2 Sn2 Zr2'
_chemical_formula_weight          1014.51
_chemical_melting_point           ?
_chemical_compound_source         ?

loop_
 _atom_type_symbol
 _atom_type_description
 _atom_type_scat_dispersion_real
 _atom_type_scat_dispersion_imag
 _atom_type_scat_source
 'C'  'C'   0.0033   0.0016
 'International Tables Vol C Tables 4.2.6.8 and 6.1.1.4'
 'H'  'H'   0.0000   0.0000
 'International Tables Vol C Tables 4.2.6.8 and 6.1.1.4'
 'Cl'  'Cl'   0.1484   0.1585
 'International Tables Vol C Tables 4.2.6.8 and 6.1.1.4'
 'Si'  'Si'   0.0817   0.0704
 'International Tables Vol C Tables 4.2.6.8 and 6.1.1.4'
 'Sn'  'Sn'  -0.6537   1.4246
 'International Tables Vol C Tables 4.2.6.8 and 6.1.1.4'
 'Zr'  'Zr'  -2.9673   0.5597
 'International Tables Vol C Tables 4.2.6.8 and 6.1.1.4'

_symmetry_cell_setting            orthorhombic
_symmetry_space_group_name_H-M    'Cmcm (no. 63)'

loop_
 _symmetry_equiv_pos_as_xyz
 'x, y, z'
 '-x, -y, z+1/2'
 '-x, y, -z+1/2'
 'x, -y, -z'
 'x+1/2, y+1/2, z'
 '-x+1/2, -y+1/2, z+1/2'
 '-x+1/2, y+1/2, -z+1/2'
 'x+1/2, -y+1/2, -z'
 '-x, -y, -z'
 'x, y, -z-1/2'
 'x, -y, z-1/2'
 '-x, y, z'
 '-x+1/2, -y+1/2, -z'
 'x+1/2, y+1/2, -z-1/2'
 'x+1/2, -y+1/2, z-1/2'
 '-x+1/2, y+1/2, z'

_cell_length_a                    14.899(1)
_cell_length_b                    12.310(1)
_cell_length_c                    19.894(1)
_cell_angle_alpha                 90.00
_cell_angle_beta                  90.00
_cell_angle_gamma                 90.00
_cell_volume                      3648.7(4)
_cell_formula_units_Z             4
_cell_measurement_temperature     140(1)
_cell_measurement_reflns_used     ?
_cell_measurement_theta_min       ?
_cell_measurement_theta_max       ?

_exptl_crystal_description        'diamond-shaped parallelipiped'
_exptl_crystal_colour             'clear, colourless'
_exptl_crystal_size_max           0.7
_exptl_crystal_size_mid           0.5
_exptl_crystal_size_min           0.45
_exptl_crystal_density_meas       ?
_exptl_crystal_density_diffrn     1.847
_exptl_crystal_density_method     ?
_exptl_crystal_F_000              1960
_exptl_absorpt_coefficient_mu     2.640
_exptl_absorpt_correction_type    'none applied'
_exptl_absorpt_correction_T_min   ?
_exptl_absorpt_correction_T_max   ?

_exptl_special_details
;
 ?
;

_diffrn_ambient_temperature       140(1)
_diffrn_radiation_wavelength      0.71073
_diffrn_radiation_type            Mo-K\a
_diffrn_radiation_source          'rotating anode'
_diffrn_radiation_monochromator   graphite
_diffrn_measurement_device        'Rigaku R-Axis-IIc'
_diffrn_measurement_method        'image-plate oscillation photos'

_diffrn_standards_number          ?
_diffrn_standards_interval_count  ?
_diffrn_standards_interval_time   ?
_diffrn_standards_decay_%         ?
_diffrn_reflns_number             8285
_diffrn_reflns_av_R_equivalents   0.0222
_diffrn_reflns_av_sigmaI/netI     0.0346
_diffrn_reflns_limit_h_min        -16
_diffrn_reflns_limit_h_max        16
_diffrn_reflns_limit_k_min        -14
_diffrn_reflns_limit_k_max        14
_diffrn_reflns_limit_l_min        -23
_diffrn_reflns_limit_l_max        23
_diffrn_reflns_theta_min          2.1
_diffrn_reflns_theta_max          25.4
_reflns_number_total              1595
_reflns_number_observed           1548
_reflns_observed_criterion        I>2sigma(I)

_computing_data_collection        'MSC R-Axis-II control software'
_computing_cell_refinement        'DENZO (Otwinowski and Minor, 1985)'
_computing_data_reduction
'DENZO, SCALEPACK (Otwinowski and Minor, 1985)'
_computing_structure_solution     'SHELXS-86 (Sheldrick, 1990)'
_computing_structure_refinement   'SHELXL-93 (Sheldrick, 1993)'
_computing_molecular_graphics     'ORTEP (Johnson, 1971)'
_computing_publication_material   'SHELXL-93 (Sheldrick, 1993)'

_refine_special_details
;
 Refinement on F^2^ for ALL reflections except for 1 with very negative F^2^
 or flagged by the user for potential systematic errors.  Weighted R-factors
 wR and all goodnesses of fit S are based on F^2^, conventional R-factors R
 are based on F, with F set to zero for negative F^2^. The observed criterion
 of F^2^ > 2sigma(F^2^) is used only for calculating _R_factor_obs etc. and is
 not relevant to the choice of reflections for refinement.  R-factors based
 on F^2^ are statistically about twice as large as those based on F, and R-
 factors based on ALL data will be even larger.
;

_refine_ls_structure_factor_coef  Fsqd
_refine_ls_matrix_type            full
_refine_ls_weighting_scheme
 'calc w=1/[\s^2^(Fo^2^)+26.5701P] where P=(Fo^2^+2Fc^2^)/3'
_atom_sites_solution_primary      direct
_atom_sites_solution_secondary    difmap
_atom_sites_solution_hydrogens    geom
_refine_ls_hydrogen_treatment     mixed
_refine_ls_extinction_method      none
_refine_ls_extinction_coef        ?
_refine_ls_number_reflns          1594
_refine_ls_number_parameters      113
_refine_ls_number_restraints      0
_refine_ls_R_factor_all           0.0445
_refine_ls_R_factor_obs           0.0434
_refine_ls_wR_factor_all          0.1098
_refine_ls_wR_factor_obs          0.1094
_refine_ls_goodness_of_fit_all    1.257
_refine_ls_goodness_of_fit_obs    1.272
_refine_ls_restrained_S_all       1.257
_refine_ls_restrained_S_obs       1.272
_refine_ls_shift/esd_max          0.000
_refine_ls_shift/esd_mean         0.000

loop_
 _atom_site_label
 _atom_site_type_symbol
 _atom_site_fract_x
 _atom_site_fract_y
 _atom_site_fract_z
 _atom_site_U_iso_or_equiv
 _atom_site_thermal_displace_type
 _atom_site_occupancy
 _atom_site_calc_flag
 _atom_site_refinement_flags
 _atom_site_disorder_group
Zr Zr 0.5000 0.23861(5) 0.65898(3) 0.0335(2) Uani 1 d S .
Cl1 Cl 0.39116(12) 0.31322(14) 0.7500 0.0394(4) Uani 1 d S .
Cl2 Cl 0.5000 0.0834(2) 0.7500 0.0366(5) Uani 1 d S .
Cl3 Cl 0.37866(9) 0.15667(11) 0.60261(6) 0.0446(3) Uani 1 d . .
Cl4 Cl 0.5000 0.4086(2) 0.60530(10) 0.0531(5) Uani 1 d S .
Sn Sn 0.35770(5) 0.29213(5) 0.34632(3) 0.0338(2) Uani 0.50 d P .
C1 C 0.3581(13) 0.3623(20) 0.4350(13) 0.051(5) Uani 0.50 d P .
H1A H 0.3781(13) 0.4361(20) 0.4305(13) 0.076 Uiso 0.50 calc PR .
H1B H 0.3979(13) 0.3237(20) 0.4645(13) 0.076 Uiso 0.50 calc PR .
H1C H 0.2985(13) 0.3614(20) 0.4533(13) 0.076 Uiso 0.50 calc PR .
C2 C 0.3166(16) 0.1339(20) 0.3470(13) 0.046(8) Uani 0.50 d P .
H2A H 0.3182(16) 0.1055(20) 0.3021(13) 0.069 Uiso 0.50 calc PR .
H2B H 0.2564(16) 0.1297(20) 0.3641(13) 0.069 Uiso 0.50 calc PR .
H2C H 0.3558(16) 0.0921(20) 0.3752(13) 0.069 Uiso 0.50 calc PR .
C3 C 0.3018(7) 0.3970(8) 0.2721(5) 0.041(3) Uani 0.50 d P .
H3A H 0.3023(7) 0.3611(8) 0.2293(5) 0.062 Uiso 0.50 calc PR .
H3B H 0.3368(7) 0.4623(8) 0.2695(5) 0.062 Uiso 0.50 calc PR .
H3C H 0.2412(7) 0.4148(8) 0.2842(5) 0.062 Uiso 0.50 calc PR .
C4 C 0.5000 0.2877(5) 0.3145(3) 0.035(2) Uani 1 d S .
H4 H 0.5198 0.3630(5) 0.3085(3) 0.008(17) Uiso 0.50 calc PR .
Si Si 0.5779(2) 0.2214(2) 0.38260(13) 0.0345(6) Uani 0.50 d P .
C5 C 0.6243(16) 0.3373(20) 0.4440(12) 0.053(6) Uani 0.50 d P .
H5A H 0.5747(16) 0.3766(20) 0.4629(12) 0.080 Uiso 0.50 calc PR .
H5B H 0.6618(16) 0.3862(20) 0.4190(12) 0.080 Uiso 0.50 calc PR .
H5C H 0.6586(16) 0.3046(20) 0.4794(12) 0.080 Uiso 0.50 calc PR .
C6 C 0.5000 0.1236(7) 0.4348(4) 0.055(2) Uani 1 d S .
H6A H 0.4507 0.1642(7) 0.4531(4) 0.083 Uiso 0.50 calc PR .
H6B H 0.5339 0.0917(7) 0.4708(4) 0.083 Uiso 0.50 calc PR .
H6C H 0.4774 0.0673(7) 0.4061(4) 0.083 Uiso 0.50 calc PR .
C7 C 0.6790(23) 0.1421(32) 0.3445(15) 0.078(12) Uani 0.50 d P .
H7A H 0.7144(23) 0.1117(32) 0.3802(15) 0.117 Uiso 0.50 calc PR .
H7B H 0.7153(23) 0.1908(32) 0.3184(15) 0.117 Uiso 0.50 calc PR .
H7C H 0.6571(23) 0.0848(32) 0.3162(15) 0.117 Uiso 0.50 calc PR .
C8 C 0.5000 0.2378(8) 0.2500 0.030(2) Uani 1 d S .
H8 H 0.5000 0.1623(8) 0.2500 0.001(16) Uiso 1 calc SR .

loop_
 _atom_site_aniso_label
 _atom_site_aniso_U_11
 _atom_site_aniso_U_22
 _atom_site_aniso_U_33
 _atom_site_aniso_U_23
 _atom_site_aniso_U_13
 _atom_site_aniso_U_12
Zr 0.0363(5) 0.0323(4) 0.0319(4) 0.0013(3) 0.000 0.000
Cl1 0.0388(10) 0.0416(9) 0.0379(8) 0.000 0.000 0.0092(7)
Cl2 0.0482(15) 0.0286(11) 0.0329(11) 0.000 0.000 0.000
Cl3 0.0422(8) 0.0504(8) 0.0411(6) -0.0039(5) -0.0053(5) -0.0043(6)
Cl4 0.0740(15) 0.0383(10) 0.0470(10) 0.0107(8) 0.000 0.000
Sn 0.0345(5) 0.0324(4) 0.0344(4) 0.0020(2) 0.0023(3) 0.0010(3)
C1 0.029(9) 0.071(12) 0.052(10) 0.044(8) -0.021(7) -0.012(8)
C2 0.041(12) 0.032(10) 0.065(17) -0.013(9) -0.033(11) 0.008(8)
C3 0.047(6) 0.030(5) 0.047(6) 0.005(3) 0.001(4) 0.011(4)
C4 0.039(4) 0.028(3) 0.036(4) 0.002(3) 0.000 0.000
Si 0.034(2) 0.0363(14) 0.0328(13) 0.0032(10) -0.0001(11) 0.0020(11)
C5 0.058(12) 0.071(12) 0.032(7) 0.028(7) 0.023(7) -0.016(8)
C6 0.082(7) 0.047(5) 0.036(4) 0.008(3) 0.000 0.000
C7 0.102(24) 0.083(23) 0.048(15) 0.017(13) -0.013(13) -0.008(17)
C8 0.025(5) 0.030(5) 0.035(5) 0.000 0.000 0.000

_geom_special_details
;
 All esds (except the esd in the dihedral angle between two l.s. planes)
 are estimated using the full covariance matrix.  The cell esds are taken
 into account individually in the estimation of esds in distances, angles
 and torsion angles; correlations between esds in cell parameters are only
 used when they are defined by crystal symmetry.  An approximate (isotropic)
 treatment of cell esds is used for estimating esds involving l.s. planes.
;

loop_
 _geom_bond_atom_site_label_1
 _geom_bond_atom_site_label_2
 _geom_bond_distance
 _geom_bond_site_symmetry_2
 _geom_bond_publ_flag
Zr Cl4 2.350(2) . ?
Zr Cl3 2.3545(14) . ?
Zr Cl3 2.3545(14) 12_655 ?
Zr Cl1 2.5984(14) 3_656 ?
Zr Cl1 2.5985(14) . ?
Zr Cl2 2.632(2) . ?
Zr Zr 3.6214(14) 10_557 ?
Cl1 Zr 2.5984(14) 10_557 ?
Cl2 Zr 2.632(2) 10_557 ?
Sn C1 1.96(3) . ?
Sn C2 2.04(3) . ?
Sn C3 2.130(9) . ?
Sn C4 2.213(2) . ?
C1 H1A 0.96 . ?
C1 H1B 0.96 . ?
C1 H1C 0.96 . ?
C2 H2A 0.96 . ?
C2 H2B 0.96 . ?
C2 H2C 0.96 . ?
C3 H3A 0.96 . ?
C3 H3B 0.96 . ?
C3 H3C 0.96 . ?
C4 C8 1.422(8) . ?
C4 Si 1.963(6) . ?
C4 H4 0.98 . ?
Si C7 1.95(3) . ?
Si C6 1.969(7) . ?
Si C5 2.00(3) . ?
Si C1 2.24(3) 12_655 ?
C5 H5A 0.96 . ?
C5 H5B 0.96 . ?
C5 H5C 0.96 . ?
C6 H6A 0.96 . ?
C6 H6B 0.96 . ?
C6 H6C 0.96 . ?
C7 H7A 0.96 . ?
C7 H7B 0.96 . ?
C7 H7C 0.96 . ?
C8 C4 1.422(8) 10_556 ?
C8 H8 0.93 . ?

loop_
 _geom_angle_atom_site_label_1
 _geom_angle_atom_site_label_2
 _geom_angle_atom_site_label_3
 _geom_angle
 _geom_angle_site_symmetry_1
 _geom_angle_site_symmetry_3
 _geom_angle_publ_flag
Cl4 Zr Cl3 99.50(5) . . ?
Cl4 Zr Cl3 99.50(5) . 12_655 ?
Cl3 Zr Cl3 100.32(7) . 12_655 ?
Cl4 Zr Cl1 90.11(6) . 3_656 ?
Cl3 Zr Cl1 164.27(5) . 3_656 ?
Cl3 Zr Cl1 90.24(5) 12_655 3_656 ?
Cl4 Zr Cl1 90.11(6) . . ?
Cl3 Zr Cl1 90.24(5) . . ?
Cl3 Zr Cl1 164.27(5) 12_655 . ?
Cl1 Zr Cl1 77.23(7) 3_656 . ?
Cl4 Zr Cl2 163.56(7) . . ?
Cl3 Zr Cl2 90.96(4) . . ?
Cl3 Zr Cl2 90.96(4) 12_655 . ?
Cl1 Zr Cl2 77.12(5) 3_656 . ?
Cl1 Zr Cl2 77.12(5) . . ?
Cl4 Zr Zr 117.03(5) . 10_557 ?
Cl3 Zr Zr 118.45(3) . 10_557 ?
Cl3 Zr Zr 118.45(4) 12_655 10_557 ?
Cl1 Zr Zr 45.83(3) 3_656 10_557 ?
Cl1 Zr Zr 45.83(3) . 10_557 ?
Cl2 Zr Zr 46.53(4) . 10_557 ?
Zr Cl1 Zr 88.35(6) 10_557 . ?
Zr Cl2 Zr 86.94(7) 10_557 . ?
C1 Sn C2 114.5(9) . . ?
C1 Sn C3 110.9(6) . . ?
C2 Sn C3 117.7(6) . . ?
C1 Sn C4 105.3(6) . . ?
C2 Sn C4 105.4(7) . . ?
C3 Sn C4 101.0(3) . . ?
Sn C1 H1A 109.5(6) . . ?
Sn C1 H1B 109.5(5) . . ?
H1A C1 H1B 109.5 . . ?
Sn C1 H1C 109.5(6) . . ?
H1A C1 H1C 109.5 . . ?
H1B C1 H1C 109.5 . . ?
Sn C2 H2A 109.5(7) . . ?
Sn C2 H2B 109.5(7) . . ?
H2A C2 H2B 109.5 . . ?
Sn C2 H2C 109.5(5) . . ?
H2A C2 H2C 109.5 . . ?
H2B C2 H2C 109.5 . . ?
Sn C3 H3A 109.5(3) . . ?
Sn C3 H3B 109.5(3) . . ?
H3A C3 H3B 109.5 . . ?
Sn C3 H3C 109.5(3) . . ?
H3A C3 H3C 109.5 . . ?
H3B C3 H3C 109.5 . . ?
C8 C4 Si 116.3(4) . . ?
C8 C4 Sn 105.6(2) . . ?
Si C4 Sn 112.3(3) . . ?
C8 C4 H4 107.4(4) . . ?
Si C4 H4 107.4(2) . . ?
Sn C4 H4 107.4(2) . . ?
C7 Si C4 113.4(10) . . ?
C7 Si C6 110.8(11) . . ?
C4 Si C6 105.7(2) . . ?
C7 Si C5 109.1(13) . . ?
C4 Si C5 109.2(7) . . ?
C6 Si C5 108.5(6) . . ?
C7 Si C1 103.9(12) . 12_655 ?
C4 Si C1 104.5(5) . 12_655 ?
C6 Si C1 118.6(5) . 12_655 ?
C5 Si C1 10.1(8) . 12_655 ?
Si C5 H5A 109.5(7) . . ?
Si C5 H5B 109.5(5) . . ?
H5A C5 H5B 109.5 . . ?
Si C5 H5C 109.5(7) . . ?
H5A C5 H5C 109.5 . . ?
H5B C5 H5C 109.5 . . ?
Si C6 H6A 109.5(2) . . ?
Si C6 H6B 109.5(2) . . ?
H6A C6 H6B 109.5 . . ?
Si C6 H6C 109.5(2) . . ?
H6A C6 H6C 109.5 . . ?
H6B C6 H6C 109.5 . . ?
Si C7 H7A 109.5(10) . . ?
Si C7 H7B 109.5(11) . . ?
H7A C7 H7B 109.5 . . ?
Si C7 H7C 109.5(11) . . ?
H7A C7 H7C 109.5 . . ?
H7B C7 H7C 109.5 . . ?
C4 C8 C4 128.8(9) 10_556 . ?
C4 C8 H8 115.6(4) 10_556 . ?
C4 C8 H8 115.6(4) . . ?

_refine_diff_density_max    0.388
_refine_diff_density_min   -0.560
_refine_diff_density_rms    0.083

#===END


data_marks3

_audit_creation_method            SHELXL
_chemical_name_systematic
;
 ?
;
_chemical_name_common             7
_chemical_formula_moiety          'C15 H39 Si2 Sn2, Hf2 Cl9'
_chemical_formula_structural      '[Me3SiCH(SnMe3)CHCH(SnMe3)SiMe3][Hf2Cl9]'
_chemical_formula_analytical      ?
_chemical_formula_sum             'C15 H39 Cl9 Hf2 Si2 Sn2'
_chemical_formula_weight          1189.05
_chemical_melting_point           ?
_chemical_compound_source         ?

loop_
 _atom_type_symbol
 _atom_type_description
 _atom_type_scat_dispersion_real
 _atom_type_scat_dispersion_imag
 _atom_type_scat_source
 'C'  'C'   0.0033   0.0016
 'International Tables Vol C Tables 4.2.6.8 and 6.1.1.4'
 'H'  'H'   0.0000   0.0000
 'International Tables Vol C Tables 4.2.6.8 and 6.1.1.4'
 'Si'  'Si'   0.0817   0.0704
 'International Tables Vol C Tables 4.2.6.8 and 6.1.1.4'
 'Cl'  'Cl'   0.1484   0.1585
 'International Tables Vol C Tables 4.2.6.8 and 6.1.1.4'
 'Hf'  'Hf'  -0.5830   6.1852
 'International Tables Vol C Tables 4.2.6.8 and 6.1.1.4'
 'Sn'  'Sn'  -0.6537   1.4246
 'International Tables Vol C Tables 4.2.6.8 and 6.1.1.4'

_symmetry_cell_setting            orthorhombic
_symmetry_space_group_name_H-M    'Cmcm  (no. 63)'

loop_
 _symmetry_equiv_pos_as_xyz
 'x, y, z'
 '-x, -y, z+1/2'
 '-x, y, -z+1/2'
 'x, -y, -z'
 'x+1/2, y+1/2, z'
 '-x+1/2, -y+1/2, z+1/2'
 '-x+1/2, y+1/2, -z+1/2'
 'x+1/2, -y+1/2, -z'
 '-x, -y, -z'
 'x, y, -z-1/2'
 'x, -y, z-1/2'
 '-x, y, z'
 '-x+1/2, -y+1/2, -z'
 'x+1/2, y+1/2, -z-1/2'
 'x+1/2, -y+1/2, z-1/2'
 '-x+1/2, y+1/2, z'

_cell_length_a                    14.860(1)
_cell_length_b                    12.280(1)
_cell_length_c                    19.901(2)
_cell_angle_alpha                 90.00
_cell_angle_beta                  90.00
_cell_angle_gamma                 90.00
_cell_volume                      3631.6(5)
_cell_formula_units_Z             4
_cell_measurement_temperature     140(1)
_cell_measurement_reflns_used     ?
_cell_measurement_theta_min       ?
_cell_measurement_theta_max       ?

_exptl_crystal_description        'opaque blocks'
_exptl_crystal_colour             off-white
_exptl_crystal_size_max           0.43
_exptl_crystal_size_mid           0.43
_exptl_crystal_size_min           0.3
_exptl_crystal_density_meas       ?
_exptl_crystal_density_diffrn     2.175
_exptl_crystal_density_method     ?
_exptl_crystal_F_000              2216
_exptl_absorpt_coefficient_mu     7.792
_exptl_absorpt_correction_type    none
_exptl_absorpt_correction_T_min   ?
_exptl_absorpt_correction_T_max   ?

_exptl_special_details
;
 ?
;

_diffrn_ambient_temperature       140(1)
_diffrn_radiation_wavelength      0.71073
_diffrn_radiation_type            Mo-K\a
_diffrn_radiation_source          'rotating anode'
_diffrn_radiation_monochromator   graphite
_diffrn_measurement_device        'Rigaku R-Axis-IIc'
_diffrn_measurement_method        'image-plate oscillation photos'
_diffrn_standards_number          ?
_diffrn_standards_interval_count  ?
_diffrn_standards_interval_time   ?
_diffrn_standards_decay_%         0
_diffrn_reflns_number             9920
_diffrn_reflns_av_R_equivalents   0.249
_diffrn_reflns_av_sigmaI/netI     0.128
_diffrn_reflns_limit_h_min        -17
_diffrn_reflns_limit_h_max        17
_diffrn_reflns_limit_k_min        -14
_diffrn_reflns_limit_k_max        14
_diffrn_reflns_limit_l_min        -24
_diffrn_reflns_limit_l_max        24
_diffrn_reflns_theta_min          2.1
_diffrn_reflns_theta_max          25.4
_reflns_number_total              1760
_reflns_number_observed           1667
_reflns_observed_criterion        I>2sigma(I)

_computing_data_collection        'MSC R-Axis-II control software'
_computing_cell_refinement        'DENZO (Otwinowski and Minor, 1985)'
_computing_data_reduction
'DENZO, SCALEPACK (Otwinowski and Minor, 1985)'
_computing_structure_solution     'SHELXS-86 (Sheldrick, 1990)'
_computing_structure_refinement   'SHELXL-93 (Sheldrick, 1993)'
_computing_molecular_graphics     'ORTEP (Johnson, 1971)'
_computing_publication_material   'SHELXL-93 (Sheldrick, 1993)'

_refine_special_details
;
 Refinement on F^2^ for ALL reflections except for 3 with very negative F^2^
 or flagged by the user for potential systematic errors.  Weighted R-factors
 wR and all goodnesses of fit S are based on F^2^, conventional R-factors R
 are based on F, with F set to zero for negative F^2^. The observed criterion
 of F^2^ > 2sigma(F^2^) is used only for calculating _R_factor_obs etc. and is
 not relevant to the choice of reflections for refinement.  R-factors based
 on F^2^ are statistically about twice as large as those based on F, and R-
 factors based on ALL data will be even larger.
;

_refine_ls_structure_factor_coef  Fsqd
_refine_ls_matrix_type            full
_refine_ls_weighting_scheme
 'calc w=1/[\s^2^(Fo^2^)+(0.0312P)^2^+20.0072P] where P=(Fo^2^+2Fc^2^)/3'
_atom_sites_solution_primary      direct
_atom_sites_solution_secondary    difmap
_atom_sites_solution_hydrogens    geom
_refine_ls_hydrogen_treatment     mixed
_refine_ls_extinction_method      none
_refine_ls_extinction_coef        ?
_refine_ls_number_reflns          1757
_refine_ls_number_parameters      113
_refine_ls_number_restraints      0
_refine_ls_R_factor_all           0.0650
_refine_ls_R_factor_obs           0.0579
_refine_ls_wR_factor_all          0.1453
_refine_ls_wR_factor_obs          0.1420
_refine_ls_goodness_of_fit_all    1.218
_refine_ls_goodness_of_fit_obs    1.223
_refine_ls_restrained_S_all       1.218
_refine_ls_restrained_S_obs       1.223
_refine_ls_shift/esd_max          -0.010
_refine_ls_shift/esd_mean         0.001

loop_
 _atom_site_label
 _atom_site_type_symbol
 _atom_site_fract_x
 _atom_site_fract_y
 _atom_site_fract_z
 _atom_site_U_iso_or_equiv
 _atom_site_thermal_displace_type
 _atom_site_occupancy
 _atom_site_calc_flag
 _atom_site_refinement_flags
 _atom_site_disorder_group
Hf Hf 0.5000 0.23930(4) 0.65973(2) 0.0374(2) Uani 1 d S .
Cl1 Cl 0.3919(2) 0.3133(2) 0.7500 0.0432(6) Uani 1 d S .
Cl2 Cl 0.5000 0.0850(3) 0.7500 0.0401(8) Uani 1 d S .
Cl3 Cl 0.37945(15) 0.1571(2) 0.60348(10) 0.0483(5) Uani 1 d . .
Cl4 Cl 0.5000 0.4080(2) 0.6057(2) 0.0565(8) Uani 1 d S .
Sn Sn 0.35757(8) 0.29184(10) 0.34646(5) 0.0385(3) Uani 0.50 d P .
C1 C 0.3548(18) 0.3651(26) 0.4402(18) 0.044(6) Uani 0.50 d P .
H1A H 0.3800(18) 0.3164(26) 0.4729(18) 0.067 Uiso 0.50 calc PR .
H1B H 0.2938(18) 0.3817(26) 0.4521(18) 0.067 Uiso 0.50 calc PR .
H1C H 0.3895(18) 0.4310(26) 0.4390(18) 0.067 Uiso 0.50 calc PR .
C2 C 0.3039(22) 0.1307(29) 0.3521(19) 0.041(6) Uani 0.50 d P .
H2A H 0.3055(22) 0.0978(29) 0.3084(19) 0.062 Uiso 0.50 calc PR .
H2B H 0.2428(22) 0.1339(29) 0.3677(19) 0.062 Uiso 0.50 calc PR .
H2C H 0.3392(22) 0.0882(29) 0.3828(19) 0.062 Uiso 0.50 calc PR .
C3 C 0.3024(11) 0.3970(12) 0.2721(7) 0.045(4) Uani 0.50 d P .
H3A H 0.3043(11) 0.3616(12) 0.2291(7) 0.067 Uiso 0.50 calc PR .
H3B H 0.3368(11) 0.4631(12) 0.2703(7) 0.067 Uiso 0.50 calc PR .
H3C H 0.2411(11) 0.4138(12) 0.2834(7) 0.067 Uiso 0.50 calc PR .
C4 C 0.5000 0.2871(9) 0.3136(5) 0.038(2) Uani 1 d S .
H4 H 0.5199 0.3623(9) 0.3068(5) 0.039(40) Uiso 0.50 calc PR .
Si Si 0.5783(3) 0.2212(3) 0.3832(2) 0.0396(9) Uani 0.50 d P .
C5 C 0.6221(22) 0.3377(27) 0.4381(21) 0.050(7) Uani 0.50 d P .
H5A H 0.5722(22) 0.3747(27) 0.4585(21) 0.075 Uiso 0.50 calc PR .
H5B H 0.6554(22) 0.3880(27) 0.4108(21) 0.075 Uiso 0.50 calc PR .
H5C H 0.6606(22) 0.3088(27) 0.4724(21) 0.075 Uiso 0.50 calc PR .
C6 C 0.5000 0.1241(10) 0.4347(6) 0.061(3) Uani 1 d S .
H6A H 0.4529 0.1658(10) 0.4554(6) 0.091 Uiso 0.50 calc PR .
H6B H 0.5346 0.0881(10) 0.4689(6) 0.091 Uiso 0.50 calc PR .
H6C H 0.4741 0.0709(10) 0.4052(6) 0.091 Uiso 0.50 calc PR .
C7 C 0.6717(20) 0.1449(30) 0.3417(19) 0.040(6) Uani 0.50 d P .
H7A H 0.6471(20) 0.0874(30) 0.3147(19) 0.060 Uiso 0.50 calc PR .
H7B H 0.7106(20) 0.1145(30) 0.3753(19) 0.060 Uiso 0.50 calc PR .
H7C H 0.7055(20) 0.1937(30) 0.3136(19) 0.060 Uiso 0.50 calc PR .
C8 C 0.5000 0.2348(11) 0.2500 0.042(4) Uani 1 d S .
H8 H 0.5000 0.1591(11) 0.2500 0.016(31) Uiso 1 calc SR .

loop_
 _atom_site_aniso_label
 _atom_site_aniso_U_11
 _atom_site_aniso_U_22
 _atom_site_aniso_U_33
 _atom_site_aniso_U_23
 _atom_site_aniso_U_13
 _atom_site_aniso_U_12
Hf 0.0383(4) 0.0358(3) 0.0382(4) 0.0014(2) 0.000 0.000
Cl1 0.039(2) 0.0458(13) 0.0451(14) 0.000 0.000 0.0084(10)
Cl2 0.048(2) 0.033(2) 0.039(2) 0.000 0.000 0.000
Cl3 0.0458(12) 0.0522(10) 0.0468(10) -0.0046(9) -0.0049(8) -0.0043(8)
Cl4 0.073(2) 0.0432(14) 0.054(2) 0.0103(13) 0.000 0.000
Sn 0.0376(8) 0.0361(6) 0.0419(6) 0.0016(4) 0.0021(4) 0.0005(5)
C1 0.017(14) 0.069(17) 0.047(10) 0.008(13) 0.004(10) 0.013(10)
C2 0.024(17) 0.044(11) 0.055(14) 0.020(9) 0.012(12) -0.009(11)
C3 0.046(9) 0.039(6) 0.048(8) 0.016(6) 0.007(6) 0.007(6)
C4 0.044(7) 0.036(5) 0.035(6) 0.006(5) 0.000 0.000
Si 0.038(3) 0.039(2) 0.042(2) 0.000(2) -0.004(2) 0.000(2)
C5 0.028(16) 0.068(15) 0.055(12) 0.023(12) -0.005(12) -0.031(10)
C6 0.099(11) 0.043(6) 0.040(6) 0.016(5) 0.000 0.000
C7 0.015(15) 0.053(16) 0.051(15) 0.008(10) -0.018(9) 0.010(10)
C8 0.031(9) 0.027(6) 0.068(11) 0.000 0.000 0.000

_geom_special_details
;
 All esds (except the esd in the dihedral angle between two l.s. planes)
 are estimated using the full covariance matrix.  The cell esds are taken
 into account individually in the estimation of esds in distances, angles
 and torsion angles; correlations between esds in cell parameters are only
 used when they are defined by crystal symmetry.  An approximate (isotropic)
 treatment of cell esds is used for estimating esds involving l.s. planes.
;

loop_
 _geom_bond_atom_site_label_1
 _geom_bond_atom_site_label_2
 _geom_bond_distance
 _geom_bond_site_symmetry_2
 _geom_bond_publ_flag
Hf Hf 3.5931(9) 10_557 ?
Hf Cl1 2.576(2) . ?
Hf Cl2 2.611(2) . ?
Hf Cl3 2.341(2) . ?
Hf Cl4 2.335(3) . ?

Sn C1 2.07(4) . ?
Sn C2 2.14(3) . ?
Sn C3 2.128(14) . ?
Sn C4 2.216(3) . ?
C1 H1A 0.96 . ?
C1 H1B 0.96 . ?
C1 H1C 0.96 . ?
C2 H2A 0.96 . ?
C2 H2B 0.96 . ?
C2 H2C 0.96 . ?
C3 H3A 0.96 . ?
C3 H3B 0.96 . ?
C3 H3C 0.96 . ?
C4 C8 1.419(12) . ?
C4 Si 1.982(9) . ?
C4 H4 0.98 . ?
Si C5 1.91(3) . ?
Si C6 1.956(10) . ?
Si C7 1.87(3) . ?
C5 H5A 0.96 . ?
C5 H5B 0.96 . ?
C5 H5C 0.96 . ?
C6 H6A 0.96 . ?
C6 H6B 0.96 . ?
C6 H6C 0.96 . ?
C7 H7A 0.96 . ?
C7 H7B 0.96 . ?
C7 H7C 0.96 . ?
C8 H8 0.93 . ?

loop_
 _geom_angle_atom_site_label_1
 _geom_angle_atom_site_label_2
 _geom_angle_atom_site_label_3
 _geom_angle
 _geom_angle_site_symmetry_1
 _geom_angle_site_symmetry_3
 _geom_angle_publ_flag
Cl1 Hf Cl1 77.19(11) . 3_656 ?
Cl1 Hf Cl2 77.05(6) . . ?
Cl3 Hf Cl1 90.47(8) . . ?
Cl3 Hf Cl1 164.34(7) 12_655 . ?
Cl4 Hf Cl1 90.48(8) . . ?
Cl3 Hf Cl2 90.92(6) . . ?
Cl4 Hf Cl2 163.95(9) . . ?
Cl3 Hf Cl3 99.85(11) . 12_655 ?
Cl4 Hf Cl3 99.35(7) . . ?
Hf Cl1 Hf 88.45(8) . 10_557 ?
Hf Cl2 Hf 86.95(10) . 10_557 ?
C1 Sn C2 110.3(13) . . ?
C1 Sn C3 110.8(9) . . ?
C1 Sn C4 107.2(8) . . ?
C3 Sn C2 117.0(12) . . ?
C2 Sn C4 110.3(9) . . ?
C3 Sn C4 100.3(5) . . ?
Sn C1 H1A 109.5(8) . . ?
Sn C1 H1B 109.5(7) . . ?
Sn C1 H1C 109.5(9) . . ?
H1A C1 H1B 109.5 . . ?
H1A C1 H1C 109.5 . . ?
H1B C1 H1C 109.5 . . ?
Sn C2 H2A 109.5(10) . . ?
Sn C2 H2B 109.5(9) . . ?
Sn C2 H2C 109.5(11) . . ?
H2A C2 H2B 109.5 . . ?
H2A C2 H2C 109.5 . . ?
H2B C2 H2C 109.5 . . ?
Sn C3 H3A 109.5(4) . . ?
Sn C3 H3B 109.5(4) . . ?
Sn C3 H3C 109.5(4) . . ?
H3A C3 H3B 109.5 . . ?
H3A C3 H3C 109.5 . . ?
H3B C3 H3C 109.5 . . ?
C8 C4 Sn 106.0(3) . . ?
C8 C4 Si 116.1(6) . . ?
C8 C4 H4 107.7(6) . . ?
Si C4 Sn 111.4(5) . . ?
Sn C4 H4 107.7(3) . . ?
Si C4 H4 107.7(3) . . ?
C5 Si C4 107.1(12) . . ?
C6 Si C4 105.4(4) . . ?
C7 Si C4 109.4(10) . . ?
C5 Si C6 111.0(12) . . ?
C7 Si C5 112.0(16) . . ?
C7 Si C6 111.6(13) . . ?
Si C5 H5A 109.5(12) . . ?
Si C5 H5B 109.5(11) . . ?
Si C5 H5C 109.5(11) . . ?
H5A C5 H5B 109.5 . . ?
H5A C5 H5C 109.5 . . ?
H5B C5 H5C 109.5 . . ?
Si C6 H6A 109.5(3) . . ?
Si C6 H6B 109.5(2) . . ?
Si C6 H6C 109.5(4) . . ?
H6A C6 H6B 109.5 . . ?
H6A C6 H6C 109.5 . . ?
H6B C6 H6C 109.5 . . ?
Si C7 H7A 109.5(10) . . ?
Si C7 H7B 109.5(9) . . ?
Si C7 H7C 109.5(12) . . ?
H7A C7 H7B 109.5 . . ?
H7A C7 H7C 109.5 . . ?
H7B C7 H7C 109.5 . . ?
C4 C8 C4 126.2(13) 10_556 . ?
C4 C8 H8 116.9(6) . . ?

_refine_diff_density_max    1.678
_refine_diff_density_min   -3.215
_refine_diff_density_rms    0.284
